# Supplementary material for: An unprecedentedc-oriented DDR@MWW zeolite hybrid membrane: new insights into H2-permselectivitiesviasix membered-ring pores
Source: Royal Society of Chemistry journal article supplement (doi:10.1039/d0ta03892j), 2020-01-01
Supplement: d0ta03892j1.pdf [file d0ta03892j1.pdf]

Electronic Supplementary Information

# **An Unprecedented *c*-Oriented DDR@MWW Zeolite Hybrid Membrane: New Insights into H<sub>2</sub>- Permselectivities via Six Membered-Ring Pores**

Eunhee Jang,<sup>1,†</sup> Jeong Hyeon Lee,<sup>2,†</sup> Sungwon Hong,<sup>1</sup> Yanghwan Jeong,<sup>1</sup>  
Jin Chul Kim,<sup>2</sup> Dongjae Kim,<sup>3</sup> Hionsuck Baik,<sup>4</sup> Eunjoo Kim,<sup>1</sup> Nakwon Choi,<sup>5,6</sup>  
Jaewook Nam,<sup>7</sup> Sung June Cho,<sup>8</sup> Sang Kyu Kwak,<sup>2,\*</sup> and Jungkyu Choi<sup>1,\*</sup>

<sup>1</sup> Department of Chemical & Biological Engineering, College of Engineering, Korea University, 145 Anam-Ro, Seongbuk-Gu, Seoul 02841, Republic of Korea

<sup>2</sup> Department of Energy Engineering, School of Energy and Chemical Engineering, Ulsan National Institute of Science and Technology (UNIST), Ulsan 44919, Republic of Korea

<sup>3</sup> School of Chemical and Biological Engineering, Seoul National University, Seoul 08826, Republic of Korea

<sup>4</sup> Korea Basic Science Institute, Seoul Center, 145 Anam-Ro, Seongbuk-Gu, Seoul 02841, Republic of Korea

<sup>5</sup> Center for BioMicrosystems, Brain Science Institute, Korea Institute of Science and Technology (KIST), 5 Hwarang-ro 14-gil, Seongbuk-Gu, Seoul 02792, Republic of Korea

<sup>6</sup> KU-KIST Graduate School of Converging Science and Technology, Korea University, 145 Anam-Ro, Seongbuk-Gu, Seoul 02841, Republic of Korea

<sup>7</sup> Institute of Chemical Process, School of Chemical and Biological Engineering, Seoul National University, Seoul 08826, Republic of Korea

<sup>8</sup> Department of Chemical Engineering, Chonnam National University, 77 Yongbong-Ro, Buk-Gu, Gwangju 61186, Republic of Korea

† These two equally contributed to this work.

\* Corresponding authors

(SKK) E-mail address: skkwak@unist.ac.kr and Phone: +82-52-217-2541

(JC) E-mail address: jungkyu\_choi@korea.ac.kr, Phone: +82-2-3290-4854, and Fax: +82-2-926-6102

## **S1. Materials and Methods**

### **S1.1. Synthesis of MWW type zeolite particles**

First, the MCM-22 precursor (hereafter denoted MCM-22(P)) was synthesized as per a method described in literature.<sup>1</sup> Specifically, NaOH (98% pellet, Sigma-Aldrich) and sodium aluminate (45 wt% Na<sub>2</sub>O and 55 wt% Al<sub>2</sub>O<sub>3</sub>, Sigma-Aldrich) were added to deionized (DI) water in a plastic bottle. Hexamethyleneimine (HMI, 97% Sigma-Aldrich) was subsequently added to the mixture. Fumed silica (CAB-O-SIL® M-5, Cabot Corporation) was slowly added to the above solution while stirring. The final mass composition of the synthetic mixture was 1 SiO<sub>2</sub>: 0.1 NaOH: 0.03 NaAlO<sub>2</sub>: 0.8 HMI: 13.1 H<sub>2</sub>O. The mixture was vigorously mixed using a shaker overnight and transferred to a Teflon liner. The Teflon liner was mounted in an autoclave, which was placed in a rotating rack inside an oven preheated to 135 °C. The reaction was conducted for 11 d with rotation at 40 rpm. After the reaction, the autoclave was quenched by cooling with tap water. The resulting MCM-22(P) was recovered using five centrifugation and washing cycles. The MCM-22(P) powder was further calcined at 550 °C for 12 h at a ramp rate of 1 °C·min<sup>-1</sup> under 200 mL·min<sup>-1</sup> air flow, yielding MCM-22 particles.

### **S1.2. MCM-22 seed layer formation**

MCM-22 seed layers on  $\alpha$ -Al<sub>2</sub>O<sub>3</sub> discs were acquired via the sonication-assisted deposition method described in the literature.<sup>2</sup> Specifically, approximately 0.05 g of calcined MCM-22 particles, 40 mL of anhydrous toluene, and an  $\alpha$ -Al<sub>2</sub>O<sub>3</sub> disc (sandwiched between cover glasses and vertically positioned with the help of a Teflon holder) were placed sequentially in a dried glass reactor. Subsequently, the glass reactor was sealed with parafilm, and sonication (UC-10P, JEIO Tech, South Korea) was conducted for approximately 20 min. After sonication was performed, the  $\alpha$ -Al<sub>2</sub>O<sub>3</sub> disc was recovered and briefly washed with fresh toluene. The resulting MCM-22 seed layer was calcined by

heating to 450 °C for 12 h at a ramp rate of 0.5 °C·min<sup>-1</sup> under 200 mL·min<sup>-1</sup> air flow. The MCM-22 seed layer is referred to as layer M.

### **S1.3. Secondary and tertiary growth for the formation of hybrid films**

The MCM-22 seed layer (i.e., layer M) was further exposed to secondary hydrothermal growth. First, the synthetic sol for the synthesis of DDR zeolites was prepared based on a previous report.<sup>3</sup> The molar composition of the final sol was 9 1-adamantylamine (97%, Sigma-Aldrich): 150 ethylenediamine (99%, Sigma-Aldrich): 100 fumed silica (CAB-O\_Sil, M5): 4000 H<sub>2</sub>O. Second, layer M was placed in a Teflon liner with the help of a Teflon holder; the seeded surface was tilted and positioned facing downward. Third, the prepared solution was poured into the Teflon liner in a stainless steel autoclave. The autoclave was placed in a rack in an oven preheated to 160 °C and the reaction was carried out for 1, 2, or 3 d and quenching was performed via cooling with tap water. The recovered layer M was washed extensively with DI water and calcined at 550 °C for 12 h at a ramp rate of 0.5 °C·min<sup>-1</sup> under 200 mL·min<sup>-1</sup> air flow. The recovered  $\alpha$ -Al<sub>2</sub>O<sub>3</sub> disc is denoted as layer MD<sub>\_xd</sub>, where M, D, and *x* indicate MCM-22 and DDR zeolites, and the hydrothermal reaction time in days (1, 2, or 3), respectively.

The calcined layer MD was inter-grown using a synthetic precursor that allows for the synthesis of ZSM-58 (DDR type zeolite). The synthetic precursor was prepared by adding the structure directing agent (SDA) of methyltropinium iodide (MTI). The details of the procedure used to prepare the synthetic precursor have been described in a previous study.<sup>4</sup> The hydrothermal reaction was carried out in an oven preheated at 130 °C for 5 or 10 d and completed by quenching with tap water. The resulting membranes were soaked in DI water in an effort to remove any impurities and then dried in an oven at 100 °C overnight. The resulting membranes are referred to as MDZ<sub>\_xd</sub> (*x* = 5 or 10), where M, D, and Z represent MCM-22, DDR, and ZSM-58 zeolites, respectively, and *x* indicates the hydrothermal reaction time (in days) for tertiary growth.

In addition, we attempted to evaluate the structural compatibility for the heteroepitaxial growth of DDR@MWW. To achieve this, layer M was exposed to the secondary hydrothermal growth of the MFI type zeolite. The synthetic sol for the MFI zeolites was prepared following a previous report.<sup>5</sup> The molar composition of the synthetic sol was 40 SiO<sub>2</sub> (tetraethyl orthosilicate, reagent grade, Sigma-Aldrich): 9 tetrapropylammonium hydroxide (1.0 M in H<sub>2</sub>O, Sigma-Aldrich): 9500 DI water: 160 ethanol. The resulting sol was poured into a Teflon-lined autoclave in which layer M had been positioned as mentioned above. The autoclave was placed in a preheated oven at 175 °C and the reaction was carried out for 1, 3, and 5 d. The recovered layer M was washed with DI water and, further, calcined at 550 °C for 12 h at a ramp rate of 0.5 °C·min<sup>-1</sup> under 200 mL·min<sup>-1</sup> air flow. For convenience, the resulting layer is referred to as layer MM<sub>\_xd</sub>, where M and M denote the MCM-22 and MFI zeolites, respectively, and *x* indicates the hydrothermal reaction time in days (1, 3, or 5), respectively.

#### **S1.4. Rapid thermal processing and activation of zeolite membranes**

To control defect structures, rapid thermal processing (RTP), as reported in the literature,<sup>6</sup> was used to treat as-synthesized membranes (MDZ<sub>\_5d</sub> or MDZ<sub>\_10d</sub>). Specifically, an as-synthesized membrane was placed in a quartz tube under argon flow of 200 mL·min<sup>-1</sup> and the preheated furnace (nominally around 1000 °C) was quickly moved toward the membrane. After 1 min, the furnace was moved away from the membrane. The membranes both receiving and not receiving RTP treatment were further calcined at 550 °C for 12 h at a ramp rate of 0.5 °C·min<sup>-1</sup> under an air flow of 200 mL·min<sup>-1</sup>. The RTP-treated MDZ membranes are denoted MDZ<sub>\_xd</sub><sub>RC</sub>, where R and C in RC stand for the rapid thermal processing and the subsequent conventional slow calcination, respectively. In contrast, MDZ membranes not receiving RTP treatment are referred to as MDZ<sub>\_xd</sub><sub>C</sub> where C represents the conventional slow calcination.

### S1.5. Characterizations

The morphologies of the zeolite particles and films were investigated via scanning electron microscopy (SEM, Hitachi S-4300) images. Before the measurement process was conducted, a Pt coating was applied to the samples. The X-ray diffraction (XRD) patterns were obtained using an XRD3003 (SEIFERT) and used to confirm the zeolite crystalline phase and an out-of-plane orientation of a seed layer and a zeolite film. For the out-of-plane orientation, crystallographic preferential orientation values were acquired by analyzing the XRD patterns of the powder and membrane samples;<sup>2</sup> the XRD peaks corresponding to the (003) and (101) planes were considered. In addition, for the structural analysis of layer MD\_2d, the XRD data were collected in reflection mode using a Rigaku Model D/MAX Ultima III (Japan) instrument with Cu K $\alpha$  radiation ( $\lambda = 0.154$  nm); the accelerating voltage and current values employed were 40 kV and 40 mA, respectively. The powder XRD patterns were indexed using the DICVOL06 program implemented in the FullProf program suite.<sup>7, 8</sup> The crystal structures of the MWW and DDR zeolite frameworks were acquired from the Database of Zeolite Structures (<http://www.iza-structure.org/databases/>) and used for Le Bail refinement.<sup>9</sup> Profile refinement of the structure model was performed using the Rietveld method in the JANA2006 package.<sup>10</sup> During Le Bail refinement, a pseudo-Voigt function and microscopic broadening, along with a manually interpolated background, were used to describe the peak shapes. The agreement factors shown in Fig. 2a are reasonable. The phase fraction of the DDR zeolite estimated from Le Bail refinement was ca. 95%, suggesting the pronounced presence of the DDR zeolite in layer MD\_2d.

To demonstrate the heteroepitaxial growth of the DDR type zeolite on the MWW type zeolite, the fast Fourier transformation (FFT) pattern of a particle detached from layer MD\_2d was acquired. To detach particles, a layer sample (i.e., layer MD\_2d) was sonicated for 3 min in 10 mL of ethanol. The particles in the sonicated sol were placed on a TEM grid by dropping. The FFT pattern was generated from high-resolution transmission electron microscopy (HR-TEM, Tecnai G<sup>2</sup> F30ST) image of layer

MD\_2d obtained using a 300-kV accelerated electron beam. The HR-TEM image was obtained along the direction perpendicular the basal plane of layer MD\_2d. In addition, Digital Micrograph (Gatan, Inc.) was used to simulate the FFT patterns. In addition, a cross-sectional specimen of MDZ\_10d\_RC was prepared by using a Helios G4 UC dual beam-focused ion beam (DB-FIB). Before conducting FIB, a Pt layer was deposited on the surface of MDZ\_10d\_RC in an effort to prevent any damage by the ion beam. Then, FIB with Ga ions thinned the thickness of the cross-sectioned specimen to ~100 nm to be suitable for TEM analysis. The prepared cross-sectioned specimen was used to obtain the cross-sectional view TEM images. For this task, we used an FEI XFEG-Titan Themis<sup>3</sup> Double Cs & Mono. TEM. To investigate the defect structure of a zeolite membrane, fluorescence confocal optical microscopy (FCOM, ZEISS LSM-700) analysis with a solid-state laser (555 nm wavelength) was used. For the FCOM measurements, the membrane samples were dyed with a fluorescent molecule (fluorescein sodium salt, C<sub>20</sub>H<sub>10</sub>Na<sub>2</sub>O<sub>5</sub>, Sigma-Aldrich (Product No.: F6377)) having an approximate diameter of ca. 1 nm,<sup>11</sup> which is larger than that of the zeolite pores (< 1 nm) but smaller than the defect size ( $\geq$  1 nm). Thus, the fluorescent molecules can selectively access the defects, while diffusion into the zeolite pores is excluded. The membrane dyeing process was conducted using an osmosis-type dye contactor; detailed information about this process has been reported in a previous study.<sup>12</sup> In the dye contactor, the surface of the membrane sample was in contact with the 1 mM fluorescein sodium salt solution, whereas the opposite support side was in contact with DI water. In this study, membrane dyeing was carried out for 12, 24, and 60 h. The FCOM images, which were obtained along the membrane thickness, were used to extract the quantitative properties (tortuosity and porosity) of the defect structure in the membranes via image processing. Detailed information about the image processing method can be found elsewhere.<sup>13</sup>

The H<sub>2</sub>/CO<sub>2</sub>, CO<sub>2</sub>/N<sub>2</sub> and CO<sub>2</sub>/CH<sub>4</sub> separation performance tests through the MDZ membrane series were implemented using a home-made permeation cell in a Wicke-Kallenbach system. The total pressures of both the feed and permeate sides were maintained at ca. 1 atm. The feed partial pressures of equimolar binary mixtures under dry conditions were 50.5 and 50.5 kPa, respectively. Under wet

conditions, the partial pressures of the binary mixtures and H<sub>2</sub>O vapor were 49, 49, and 3 kPa, respectively. The feed mixtures with ca. 100 mL·min<sup>-1</sup> (on the dry basis) were fed into the feed stream, and He sweep gas of ca. 100 mL·min<sup>-1</sup> was fed to the permeate side. A gas chromatography (GC; YL 6100 GC, YL Instrument) system equipped with a packed column (6 ft × 1/8" Porapak T) and thermal conductivity detector (TCD) was employed for the on-line detection of CO<sub>2</sub> and N<sub>2</sub> permeates. In addition, for the H<sub>2</sub>/CO<sub>2</sub> and CO<sub>2</sub>/CH<sub>4</sub> separation performance tests, a GC system (YL 6500 GC System, YL Instrument) equipped with a capillary column (30 m × 0.320 mm GS-GasPro) and a pulsed discharge ionization detector (PDD) was employed for the on-line detection of H<sub>2</sub> and CO<sub>2</sub> permeates or CO<sub>2</sub> and CH<sub>4</sub> permeates. For obtaining reliable measurements, internal standards of approximately 5 mL·min<sup>-1</sup> of CH<sub>4</sub> and 5 mL·min<sup>-1</sup> of H<sub>2</sub> were employed to measure the permeation rates of gas pairs: H<sub>2</sub>/CO<sub>2</sub> (or CO<sub>2</sub>/N<sub>2</sub>) and CO<sub>2</sub>/CH<sub>4</sub>, respectively.

## **S2. Computational modeling**

### **S2.1. Density functional theory calculations**

To investigate the diffusion energy barriers and binding energies of gas molecules, cage-shaped cluster models of the DDR zeolite were constructed for density functional theory (DFT) calculations. To represent the (001) plane of the *c*-out-of-plane oriented DDR zeolite membrane, a 46T model was generated using a whole dtr cage (4<sup>3</sup>5<sup>12</sup>6<sup>18</sup>3) and half of an adjacent dtr cage along with employing a partial optimization procedure (Fig. S17a).<sup>14, 15</sup> In addition, to represent the (101) plane of the (101)-oriented DDR zeolite membrane and investigate the interactions of gas molecules with the non-zeolitic defects, a 48T model, composed of a dtr cage and a portion of det (4<sup>3</sup>5<sup>6</sup>6<sup>1</sup>) and red (5<sup>12</sup>) cages to describe the 8-MR pore window and surface structure, was considered (Fig. S17b), as used in our previous study.<sup>4</sup> All DFT calculations were conducted using the Dmol<sup>3</sup> program.<sup>16, 17</sup> Specifically, we employed the Perdew-Burke-Ernzerhof (PBE) exchange-correlation function<sup>18</sup> with the DNP 4.4 basis set. The convergence criteria for energy, force, and displacement were set to 1 × 10<sup>-5</sup> Ha, 0.002 Ha·Å<sup>-1</sup>, and 0.005

Å, respectively. To consider the van der Waals effects, the Tkatchenko-Scheffler scheme<sup>19</sup> was adopted. The potential energy barrier of a gas molecule passing through the 6 MR pores was calculated by placing the C atom in CO<sub>2</sub> and one of two H atoms in H<sub>2</sub> at the center of mass of the 6-MR pore in the 46T model and by moving the molecule in the direction perpendicular to the 6-MR pore (Fig. 5a). In addition, the binding energy ( $\Delta B.E.$ ) of a gas molecule to the grain boundary of the DDR membrane (i.e., 48T model) was calculated by using the following equation,

$$\Delta B.E. = E_{gas+zeo-48T} - (E_{gas} + E_{zeo-48T}),$$

where  $E_{gas+zeo-48T}$ ,  $E_{gas}$ , and  $E_{zeo-48T}$  are the total energies of the gas-adsorbed 48T model, an isolated gas molecule, and the 48T model, respectively.

## S2.2. Nonequilibrium molecular dynamics (NEMD)

To predict the permeability of the gas molecules through the DDR membrane, nonequilibrium molecular dynamics (NEMD) simulations implemented by the LAMMPS package<sup>20</sup> were applied to a DDR slab model. We constructed two slab models, where the *z*-axis was set to be perpendicular to either the (001) plane (Fig. S17c) or the (101) plane (Fig. S17d) of the DDR zeolite. In both models, there was a 5-nm thin membrane layer along with a 50.0-nm-long region (on the feed side) and a 20.0-nm-long region (on the permeation side). In addition, to examine the effect of defects on the permeabilities, we removed a part (reflected by an empty gap) of the slab model to describe a defect, while considering the cage structure exposed to the defect structure. Accordingly, this resulted in a planar defect structure of a width *d*; this planar structure was employed in an effort to describe cracks present in MDZ\_10d. In this study, we considered four cases of defects in each slab model (*d* = 0.6, 0.8, 1.0, and 2.0 nm). At the membrane surface and planar defect surface, silanol groups (Si-OH) were used as terminating groups. Along the *z*-axis of the slab model, we considered a non-periodic condition and placed impermeable walls in the simulation box so that gas molecules could not move directly from the feed region to the permeation region without passing through the zeolite membrane layer. The molecular models and force field

parameters of CO<sub>2</sub> and H<sub>2</sub> were employed as per the EPM2 model of Harris and Yung<sup>21</sup> and the monoatomic model developed by Kumar et al.<sup>22</sup>, respectively. For the atomic charges and van der Waals parameters of the DDR zeolite, we employed CLAYFF.<sup>23</sup>

The NEMD simulations were conducted for 6 ns at four different inlet pressure conditions (CO<sub>2</sub>:H<sub>2</sub> = (1) 50 kPa:50 kPa, (2) 100 kPa:100 kPa, (3) 250 kPa:250 kPa, and (4) 500 kPa:500 kPa) and two temperature conditions (T = 30 and 200 °C). The simulations were carried out by maintaining the total number of gas molecules to ensure a constant pressure difference between the feed and permeation regions. To reduce the perturbing effects when adding or removing molecules, we assigned the halves of the feed and permeation regions as the inlet and outlet control regions, respectively (Fig. S17c-d). While we kept counting the gas molecules (related to the permeability) that had passed through the membrane model, at every 100 ps, we counted the number of gas molecules in the control regions of both the feed and permeation regions and added or removed CO<sub>2</sub> and H<sub>2</sub> gas molecules to the feed part or from the permeation part, respectively, to maintain an initial number (i.e., partial pressure) of each component. The initial number of gas molecules in the feed region was obtained via grand canonical Monte Carlo simulation (GCMC), as shown in Table S1, whereas that of the permeation region was set to zero. We implemented the GCMC simulation using a Sorption program,<sup>24</sup> and employed the same molecular models and force field parameters of gas molecules employed in the NEMD simulation. GCMC simulations of  $5 \times 10^6$  equilibrium and  $5 \times 10^6$  production steps were performed to obtain the initial number of gas molecules at each pressure and temperature in the feed region.

### **S3. Supplemental discussion regarding experimental results**

In addition, the water vapor in the feed increased the CO<sub>2</sub>/N<sub>2</sub> SF at the expense of a reduced CO<sub>2</sub> permeance especially below 100 °C (Fig. S11b1-b2). In contrast, the reduced degree of the permeance was higher for CO<sub>2</sub> than CH<sub>4</sub> in the CO<sub>2</sub>/CH<sub>4</sub> separation, thereby decreasing the corresponding CO<sub>2</sub>/CH<sub>4</sub>

SF up to approximately 50 °C under wet conditions (Fig. S11c1-c2). In particular, the trends in CO<sub>2</sub>/N<sub>2</sub> and CO<sub>2</sub>/CH<sub>4</sub> separations induced by water vapor were quite similar to those of the reported homogeneous DDR membrane.<sup>4</sup> The main difference is the aforementioned lowered CO<sub>2</sub> permeance in MDZ\_10d\_RC, apparently arising from the significant portion of preferentially *c*-out-of-plane oriented DDR zeolite. The higher CO<sub>2</sub>/N<sub>2</sub> SF under wet conditions could be ascribed to the hydrophobicity of siliceous DDR zeolites in MDZ\_10d\_RC (see the inset of Fig. 1e),<sup>4,25</sup> as supported by water contact angle measurements, which yielded a contact angle of 75° (Fig. S12). In contrast, in contact angle measurements of MDZ\_10d\_C, the water droplet quickly penetrated the sample and disappeared, indicating the presence of many defects in MDZ\_10d\_C (Fig. S12).

#### **S4. Supplemental discussion regarding simulation results**

##### **S4.1. Permeation through the (001)-oriented DDR membranes**

To estimate the permeability of CO<sub>2</sub> and H<sub>2</sub> through the zeolite membranes, 1-ns NEMD simulations were conducted and repeated six times. For analysis, we chose the results of the 4<sup>th</sup>, 5<sup>th</sup>, and 6<sup>th</sup> simulations to estimate the molar fluxes. The number of permeated molecules across the zeolite membrane showed a linear dependence on the feed pressure (Fig. S18). However, CO<sub>2</sub> could not even pass through the zeolite membrane having 0.6-nm-thick defects at low feed pressure, suggesting that the 0.6-nm-thick defect was too narrow. Further, this impermeability was observed at the highest pressure considered in this study (i.e., 500 kPa) at 200 °C. To observe the effect of pressure on the permeation rate, the slope of the linear regression line obtained from the number of permeating molecules versus pressure (equivalent to permeance) is shown in Fig. 5c. The permeability of H<sub>2</sub> was always higher than that of CO<sub>2</sub>, regardless of the pressure and temperature conditions considered in this study. This trend was inconsistent with the permeation results of the *c*-oriented hybrid membrane (MDZ\_10d\_RC) obtained in this study (Fig. 3b). Because, in general, the zeolite membrane contained defects (here, cracks, as shown in Fig. 4c2-c4 and 4d2-d4), we also calculated the permeabilities of CO<sub>2</sub> and H<sub>2</sub> through the (001)-

oriented DDR membrane containing planar defects (of up to ca. 2 nm). However, the aforementioned trend in higher H<sub>2</sub> permeability was not changed, but the increased defect size resulted in the larger permeabilities (Figs. 5c and S18).

Considering molecular transport through microporous defects, the transport of CO<sub>2</sub> was likely to be more energetically favorable than that of H<sub>2</sub> because of the preferred adsorption of CO<sub>2</sub> on the presumed defect surface over H<sub>2</sub>. Specifically, the binding energy of CO<sub>2</sub> on the surface of the 48T model based on the DFT calculations was -7.19 kcal·mol<sup>-1</sup>, which was significantly larger than that of H<sub>2</sub> (-3.47 kcal·mol<sup>-1</sup>) (Fig. S20). However, the corresponding MD-based permeances, which are coupled functions of diffusion and adsorption, clearly indicate the overall facilitated transport of H<sub>2</sub> over CO<sub>2</sub> across the defects (Fig. 5c), strongly showing that MD simulations are useful for predicting the intrinsic or extrinsic permeation results of zeolite membranes. Furthermore, to understand the low permeability of CO<sub>2</sub> in the NEMD simulations, additional DFT calculations with the 48T model were conducted (Fig. S21). At the pore mouth of an 8-MR pore, the binding energy of CO<sub>2</sub> (-11.86 kcal·mol<sup>-1</sup>) was much larger than that near the defect surface (-7.19 kcal·mol<sup>-1</sup>). Notably, the difference in binding energy ( $\Delta E$ ) of CO<sub>2</sub> and H<sub>2</sub> with a zeolite structure was larger at the pore mouth (i.e., 7.61 kcal·mol<sup>-1</sup> at the pore mouth as in Fig. S21 vs.  $\Delta E = 3.72$  kcal·mol<sup>-1</sup> near the defect surface as in Fig. S20). This implies that CO<sub>2</sub> could preferentially diffuse along the 8-MR pores in the DDR zeolite (i.e., from the defect side to the DDR zeolite portion (in-plane directions) instead of going through the defects (out-of-plane direction)) rather than the defects having widths of up to 2.0 nm, though the CO<sub>2</sub> permeances increased with increasing defect width (Figs. 5c and S18).

#### **S4.2. Permeation through the (101)-oriented DDR membranes**

In addition, we considered another preferred out-of-plane case in the DDR zeolite membrane. Specifically, the (101)-oriented DDR zeolite membrane reported in our previous study<sup>4</sup> was chosen,

because the corresponding experimental results are available. The permeabilities of CO<sub>2</sub> and H<sub>2</sub> molecules passing through the (101)-oriented DDR zeolite membrane were calculated at a variety of feed pressures, temperatures, and defect widths (Figs. 5d and S19). In general, the number of permeating gas molecules increased with increasing defect width, as for case of the (001)- or *c*-oriented DDR zeolite membrane (Figs. 5c and S18). As expected from Fig. S21, the CO<sub>2</sub> permeability at 30 °C was higher than that of H<sub>2</sub>, seemingly because of the energetically favorable adsorption of CO<sub>2</sub> molecules at the pore mouth of the 8-MR pore. However, this characteristic trend, likely determined by the affinity of H<sub>2</sub> or CO<sub>2</sub> onto the DDR zeolite, was reversed at an elevated temperature of 200 °C. It appears that the elevated temperature activated the diffusion of H<sub>2</sub> across the 8-MR pores over CO<sub>2</sub>. Moreover, this temperature dependency of permeation rates agreed with experimental results of the (101)-oriented DDR zeolite membrane.<sup>4</sup>

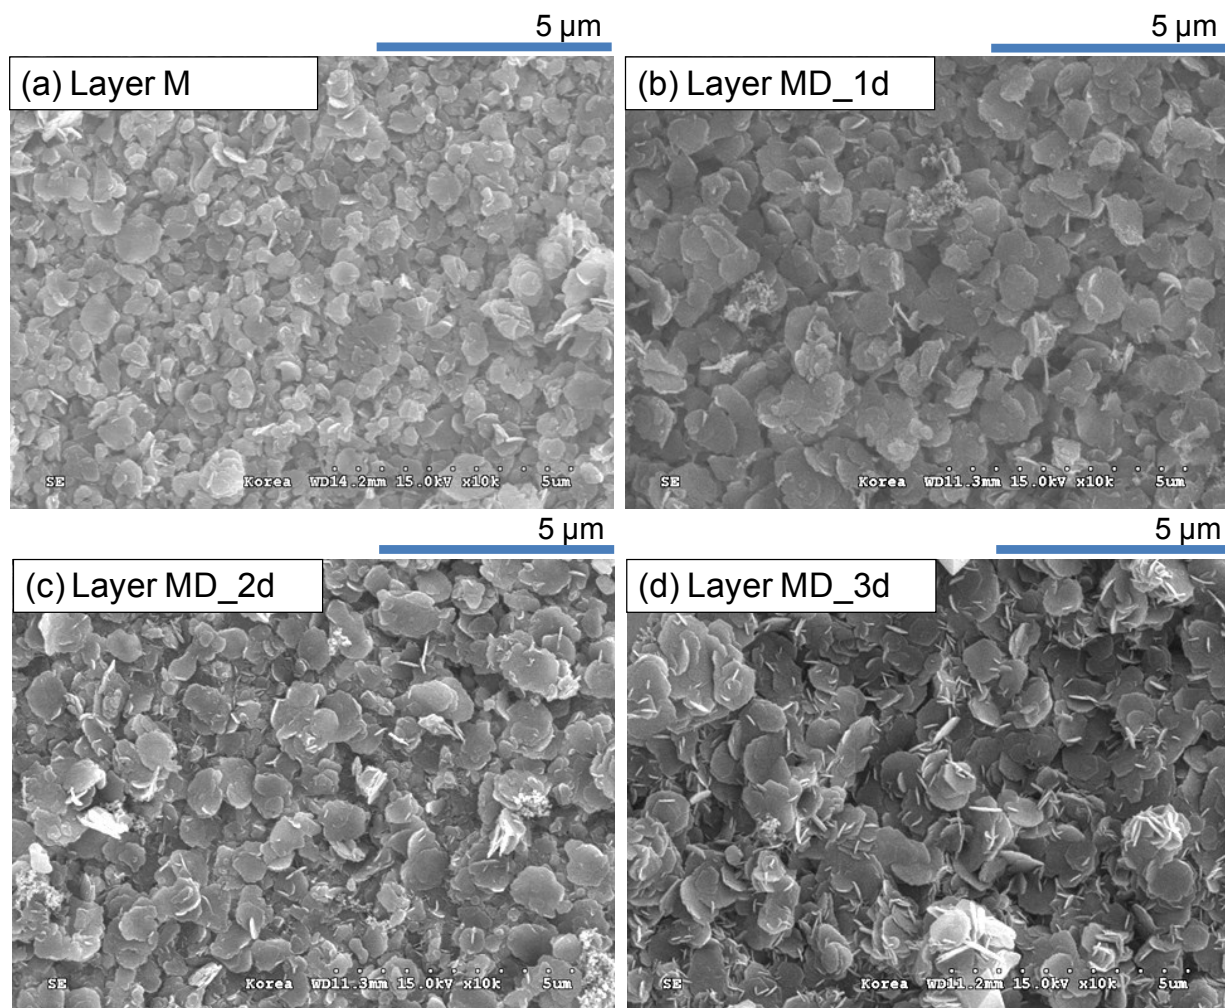

Fig. S1. Top view SEM images of layers (a) M, (b) MD\_1d, (c) MD\_2d, and (d) MD\_3d.

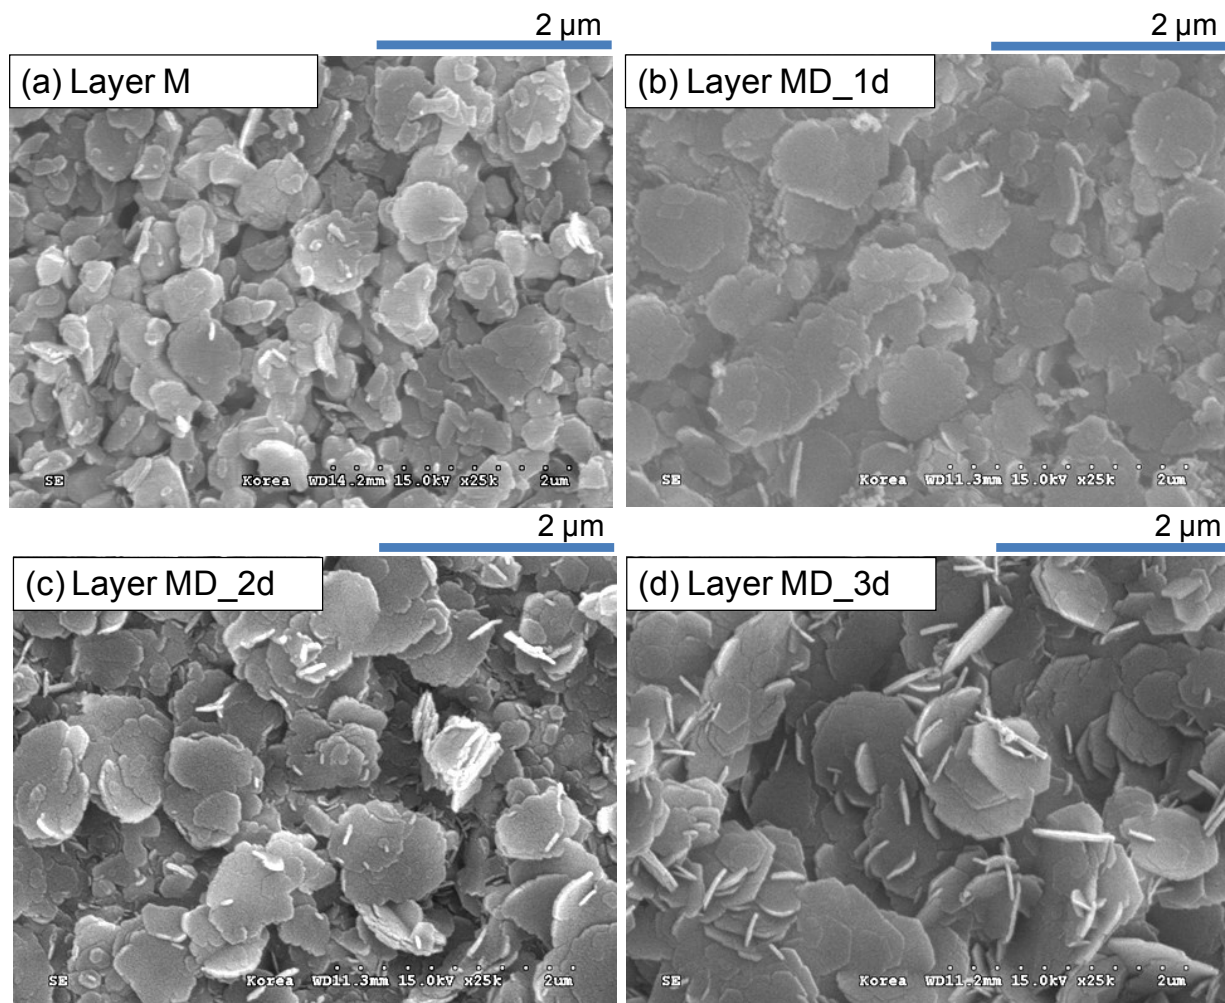

Fig. S2. Top view SEM images of layers (a) M, (b) MD\_1d, (c) MD\_2d, and (d) MD\_3d at a higher magnification relative to those shown in Fig. S1.

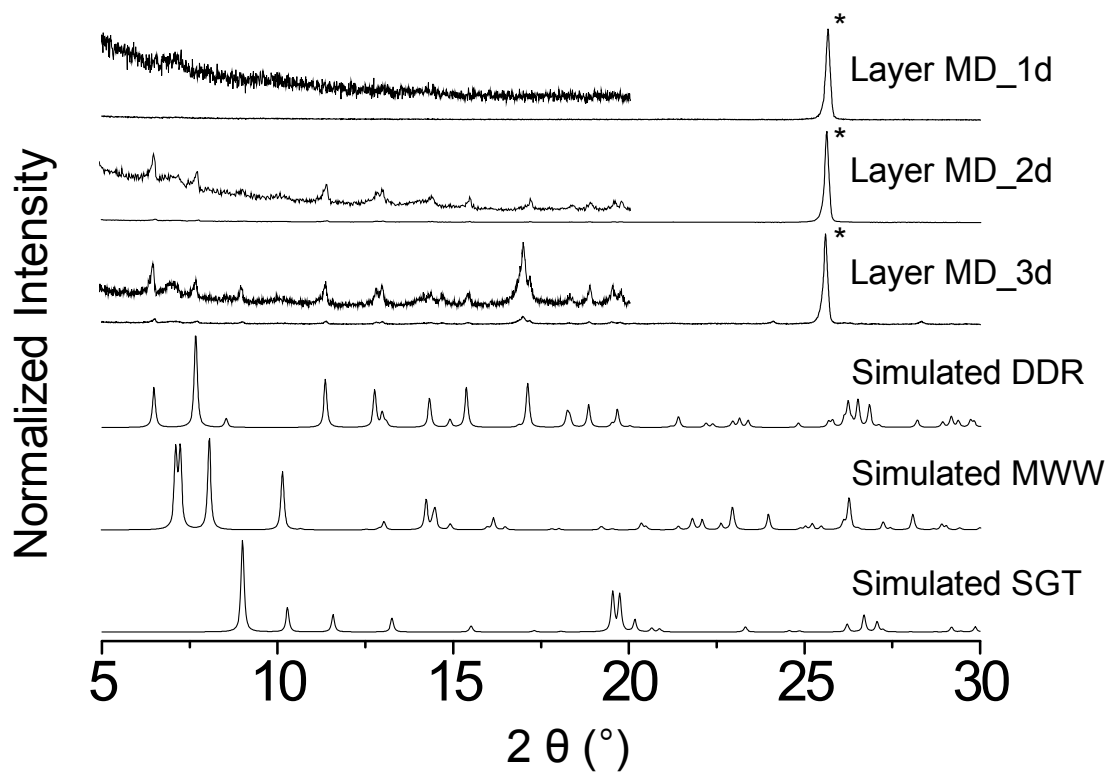

Fig. S3. XRD patterns of layers MD\_1d, \_2d, and \_3d along with the simulated XRD patterns of all-silica DDR, MWW, and SGT type zeolites. The XRD patterns of layers MD\_1d, \_2d, and \_3d in the  $2\theta$  range of 5-20° are magnified and displayed on the top of the original XRD patterns. The asterisks (\*) represent the XRD peaks corresponding to the  $\alpha$ -Al<sub>2</sub>O<sub>3</sub> disc.

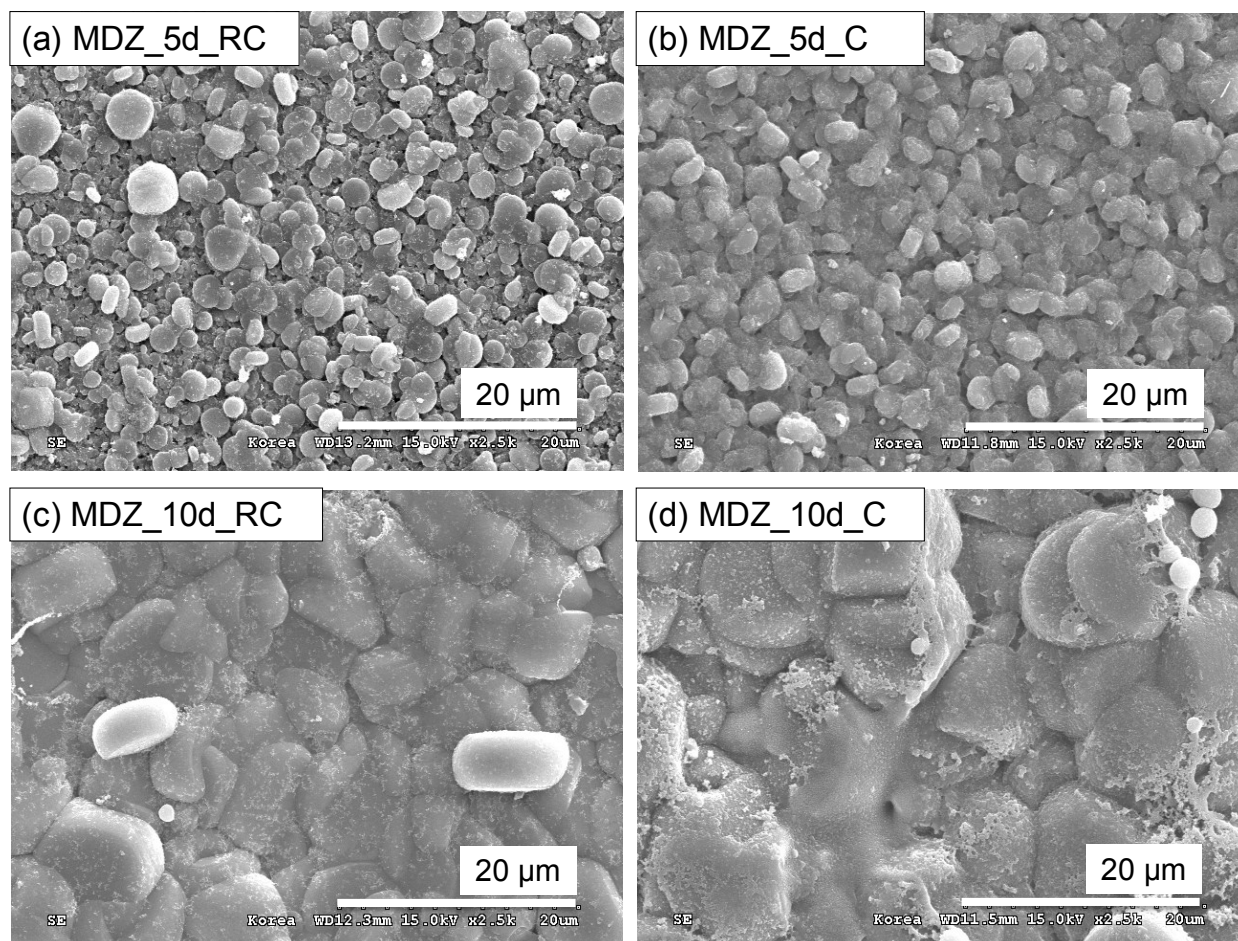

Fig. S4. SEM images of (a) MDZ\_5d\_RC, (b) MDZ\_5d\_C, (c) MDZ\_10d\_RC, and (d) MDZ\_10d\_C. The scale bars represent 20 μm.

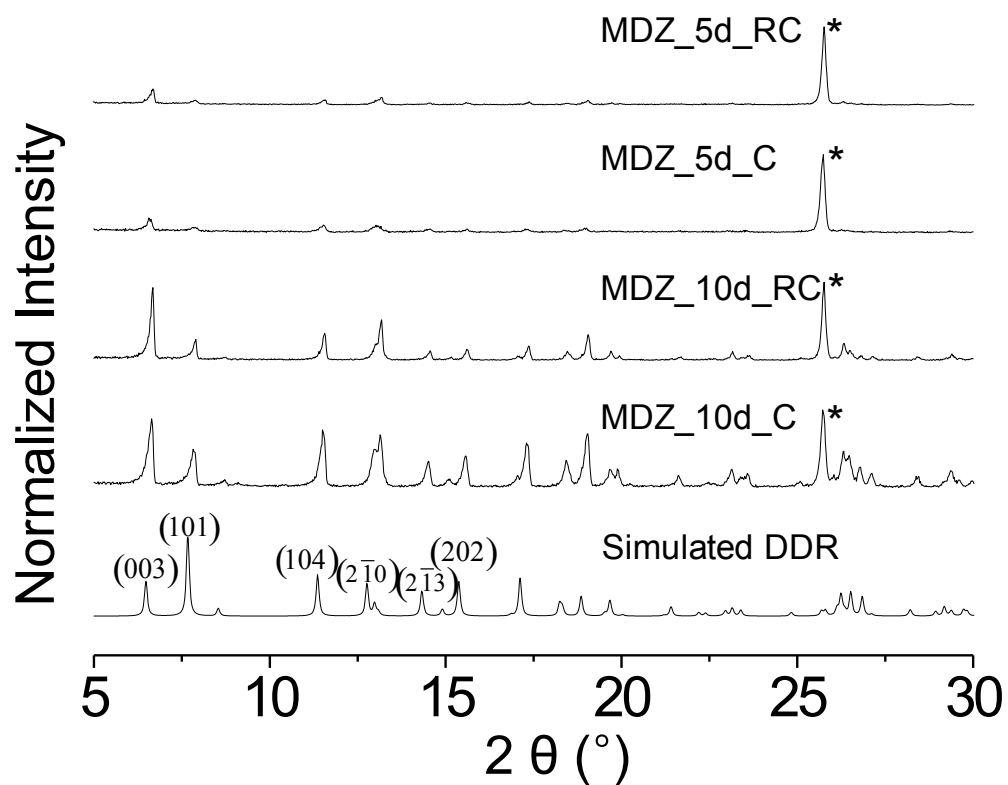

Fig. S5. XRD patterns of MDZ\_5d\_RC, MDZ\_5d\_C, MDZ\_10d\_RC, and MDZ\_10d\_C from the 1<sup>st</sup> row to the 4<sup>th</sup> row, respectively, along with the simulated XRD pattern of the DDR zeolite (*bottom*). The asterisk (\*) represents the XRD peak arising from the  $\alpha$ -Al<sub>2</sub>O<sub>3</sub> disc.

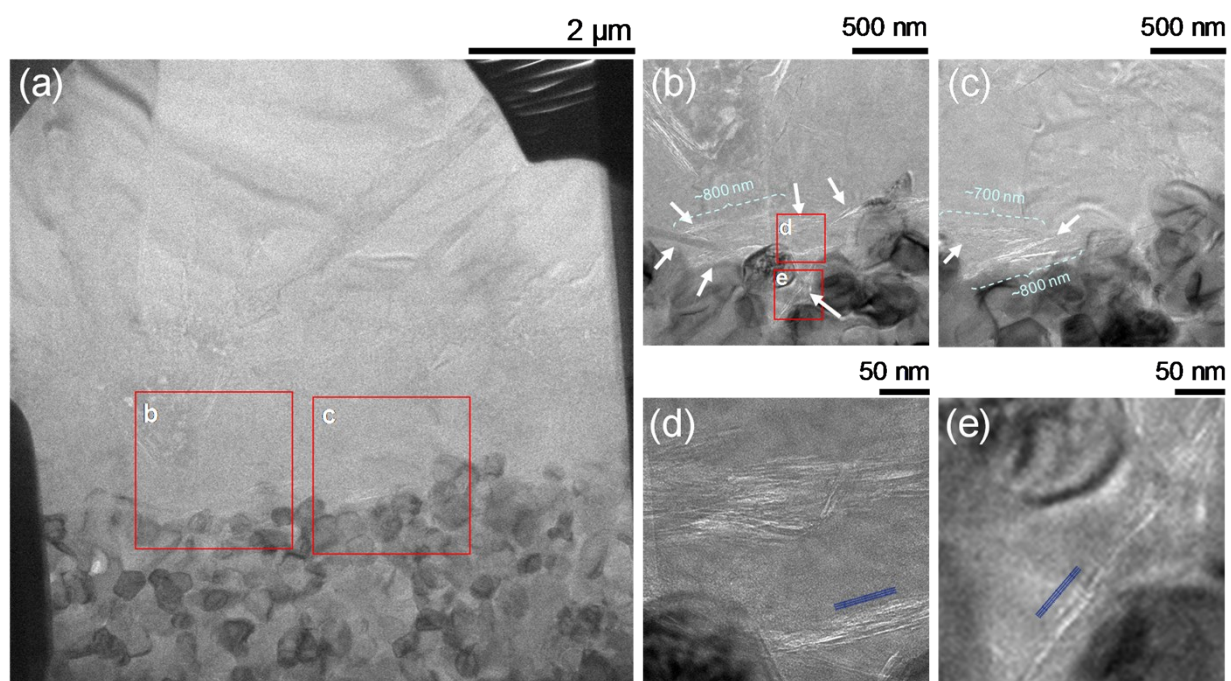

Fig. S6. (a)-(e) Cross-sectional view TEM images of MDZ\_10d\_RC at different magnifications; increasing in order of (a), (b)-(c), and (d)-(e). The areas marked in red squares in (a) are shown in (b) and (c), while those marked in red squares in (b) are magnified and demonstrated in (d) and (e). For convenience, in (b)-(c), some white arrows are added to indicate needle-like particles (plausibly, obtained as a result of cutting in the direction perpendicular to disc-like MCM-22 seed particles) and approximate lengths of needle-like particles ( $\sim 700$ - $800$  nm; these are close to the size ( $\sim 1$   $\mu\text{m}$ ) of the disc-like MCM-22 particles shown in Figs. 1a and S2a) are given. In addition, in (d)-(e), the MCM-22 structure models projected along the  $b$ -axis are displayed next to the needle-like particles.

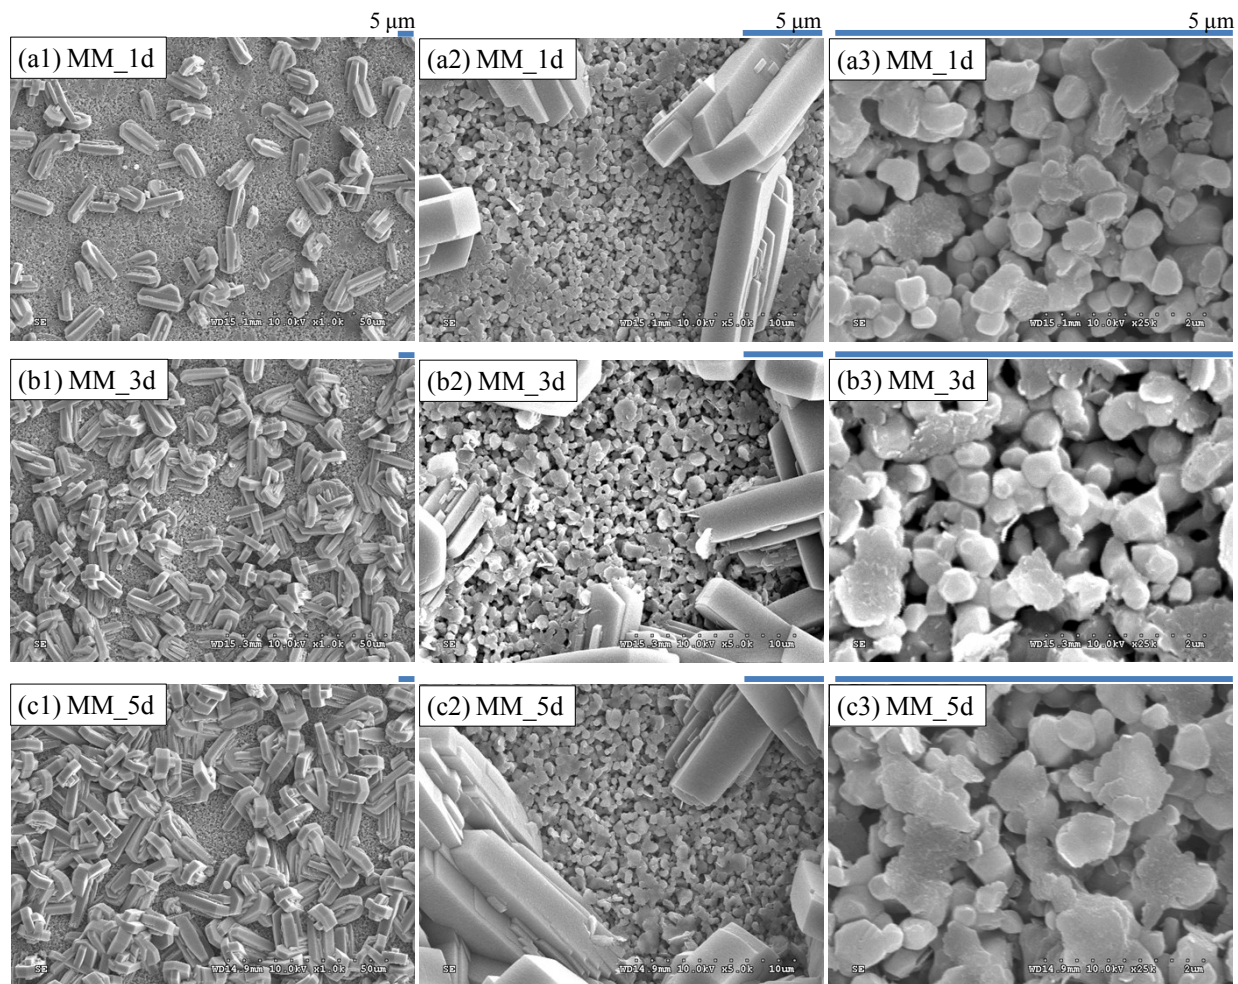

Fig. S7. SEM images of (a1)-(a3) MM<sub>1d</sub>, (b1)-(b3) MM<sub>3d</sub>, and (c1)-(c3) MM<sub>5d</sub> at increasing magnifications. The blue scale bars represent 5  $\mu\text{m}$ . For convenience, samples obtained after the secondary growth of layer M are referred to as MM<sub>x</sub>d, where the second “M” represents the MFI type zeolite growth and  $x$  indicates the used time (in days) for the secondary growth of layer M.

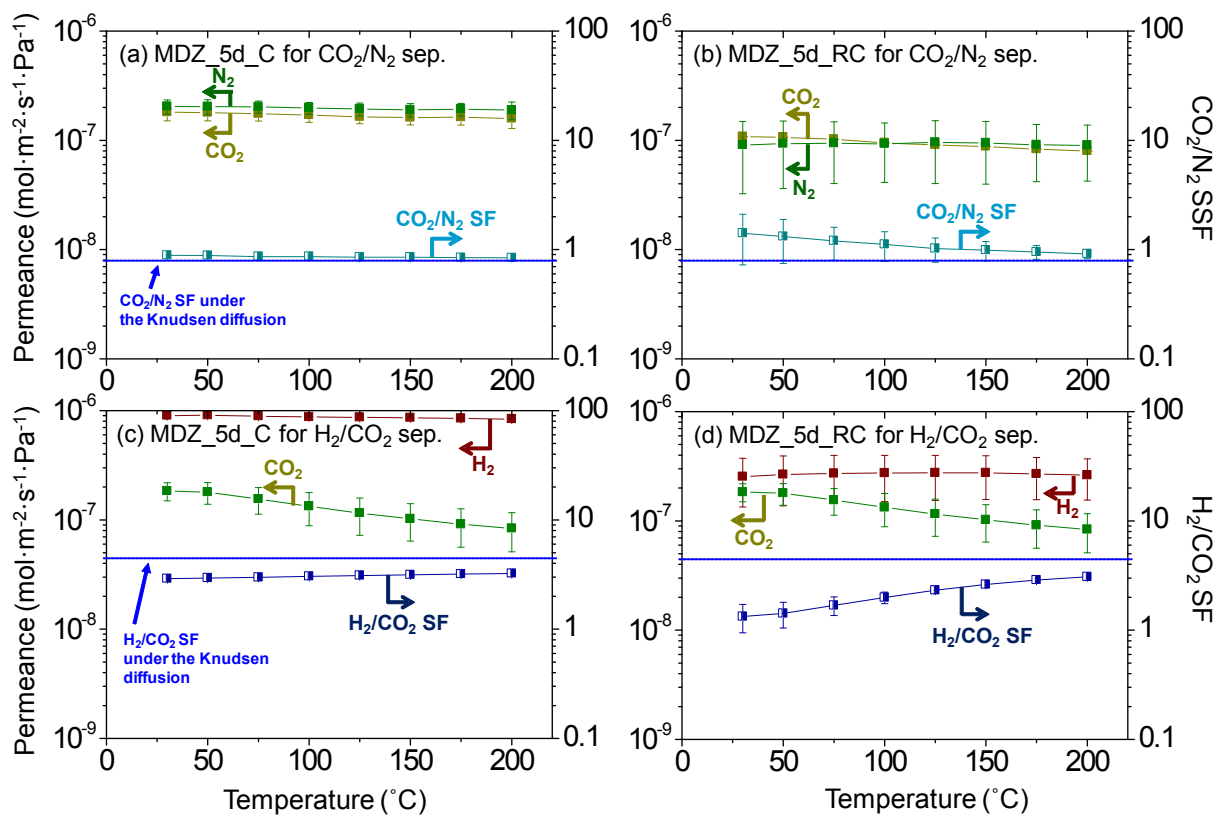

Fig. S8. Permeances of the binary mixtures of (a)-(b)  $\text{CO}_2/\text{N}_2$  and (c)-(d)  $\text{H}_2/\text{CO}_2$  and the corresponding separation factors obtained through (a) & (c) MDZ\_5d\_C and (b) & (d) MDZ\_5d\_RC, respectively. For comparison, the  $\text{CO}_2/\text{N}_2$  and  $\text{H}_2/\text{CO}_2$  SFs, determined assuming Knudsen diffusion, are included as blue dashed lines.

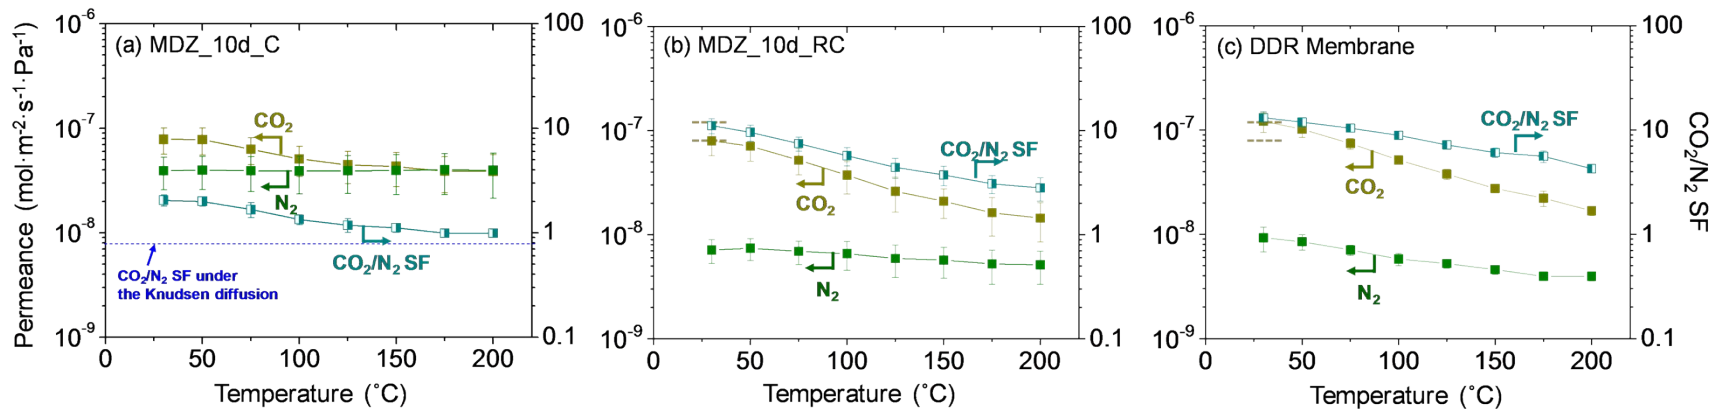

Fig. S9. Permeances of the equimolar binary mixtures of CO<sub>2</sub>/N<sub>2</sub> and the corresponding SFs obtained through (a) MDZ\_10d\_C, (b) MDZ\_10d\_RC, and (c) DDR membrane<sup>4</sup> under dry conditions. In (a), the CO<sub>2</sub>/N<sub>2</sub> SF, determined assuming Knudsen diffusion, is denoted by the blue dashed line. For better comparison, in (b)-(c), the CO<sub>2</sub> permeances at ca. 30 °C for MDZ\_10d\_RC and DDR membranes are indicated by the dark yellow dashed lines.

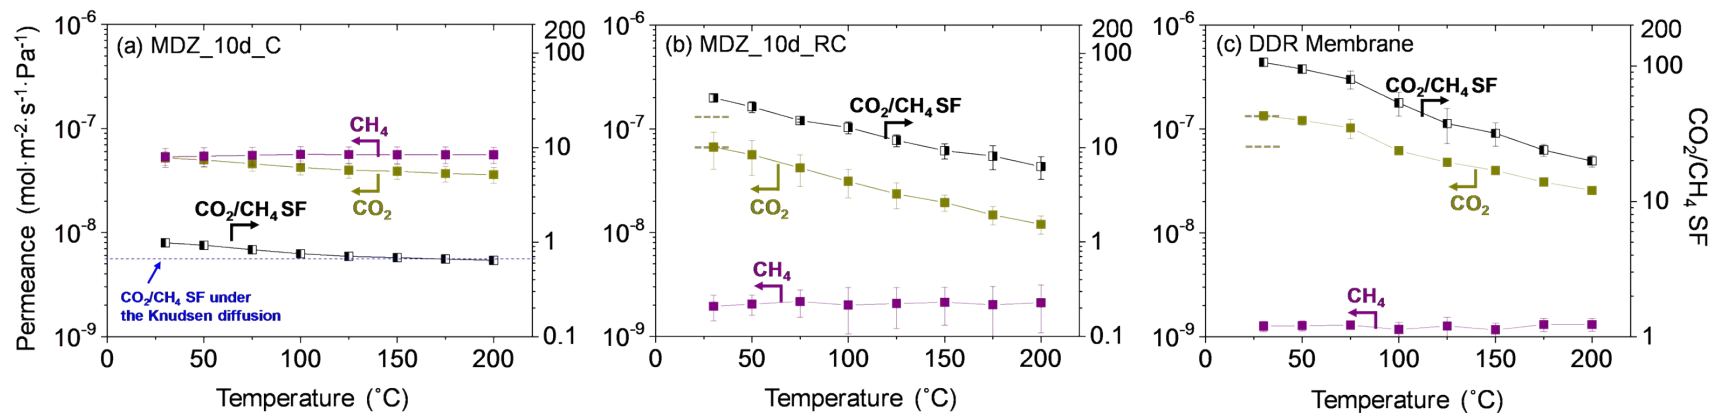

Fig. S10. Permeances of the equimolar binary mixtures of  $\text{CO}_2/\text{CH}_4$  and the corresponding SFs obtained through (a) MDZ\_10d\_C, (b) MDZ\_10d\_RC, and (c) DDR membrane<sup>4</sup> under dry conditions. In (a), the  $\text{CO}_2/\text{CH}_4$  SF, determined assuming Knudsen diffusion, is denoted by the blue dashed line. For better comparison, in (b)-(c), the  $\text{CO}_2$  permeances at ca. 30 °C for MDZ\_10d\_RC and DDR membranes are indicated by the dark yellow dashed lines.

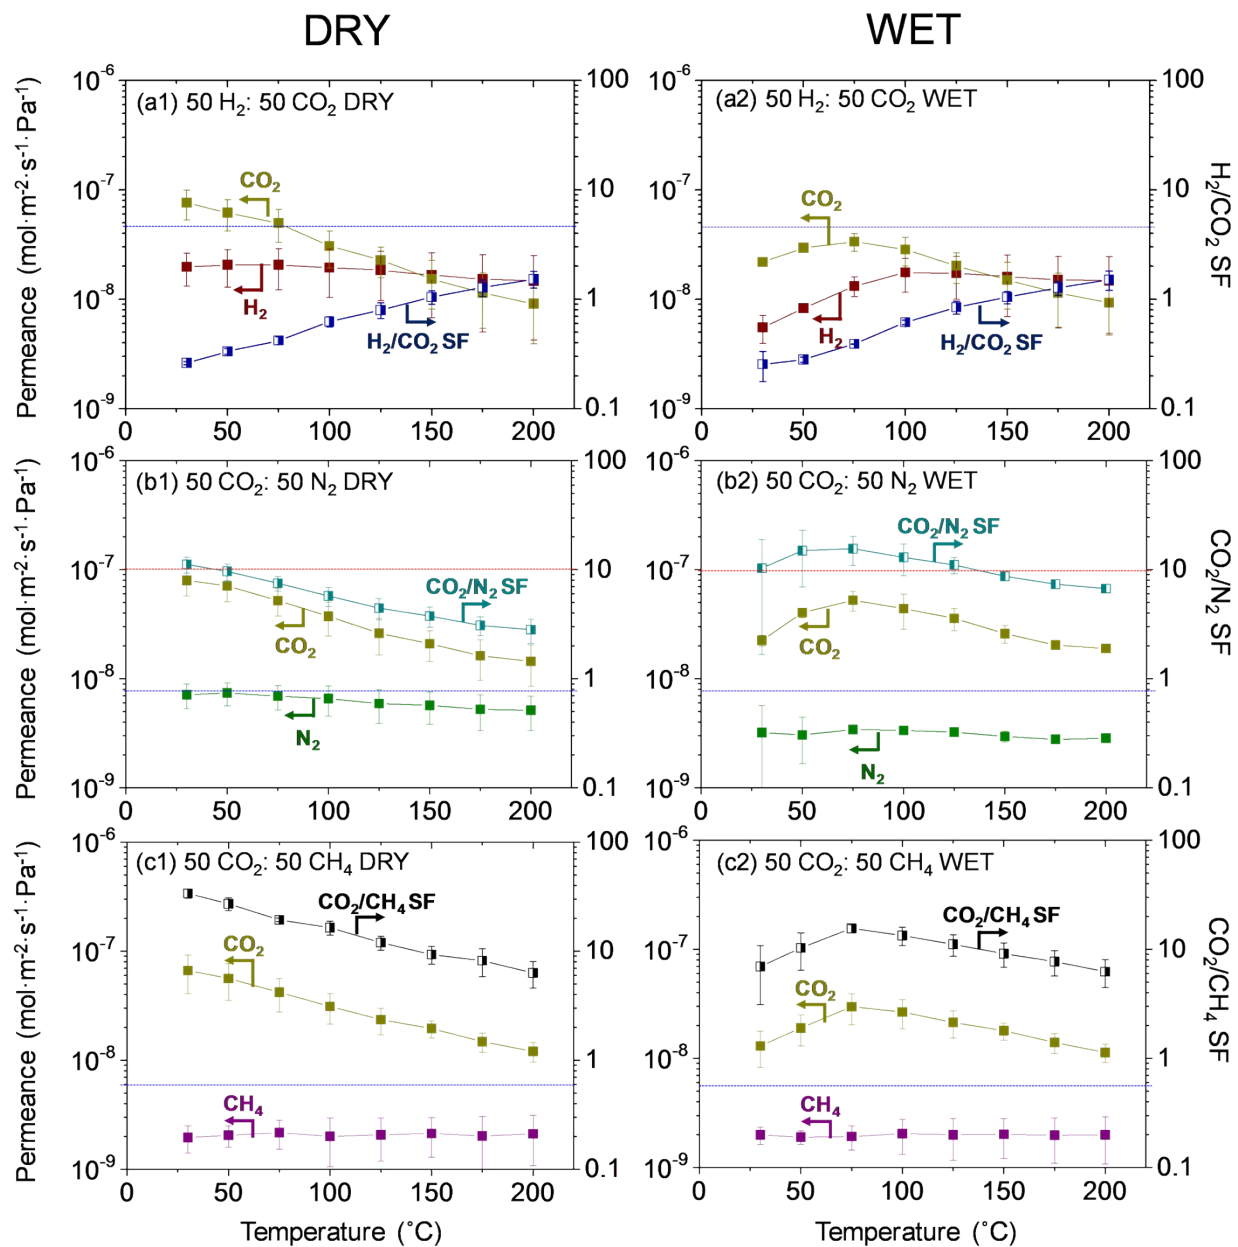

Fig. S11. Permeances of equimolar binary mixtures of (a1)-(a2)  $\text{H}_2/\text{CO}_2$ , (b1)-(b2)  $\text{CO}_2/\text{N}_2$ , and (c1)-(c2)  $\text{CO}_2/\text{CH}_4$  and the corresponding SFs obtained through MDZ\_10d\_RC under dry (*left*) and wet (*right*) conditions. In all graphs, the  $\text{H}_2/\text{CO}_2$ ,  $\text{CO}_2/\text{N}_2$ , and  $\text{CO}_2/\text{CH}_4$  SFs, determined assuming Knudsen diffusion, are indicated by blue dashed lines. In addition, in (b2)-(b3), the  $\text{CO}_2/\text{N}_2$  SF of 10 is included and indicated by the red dashed line.

(a) MDZ\_10d\_C

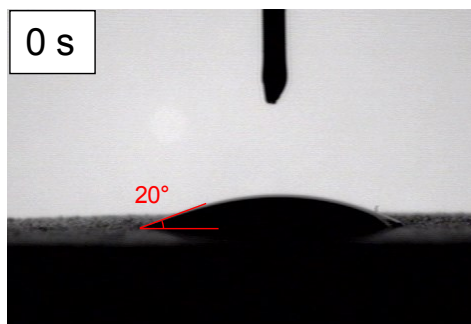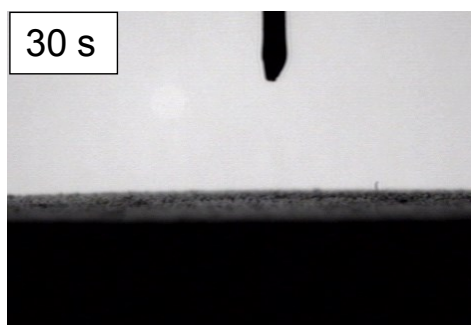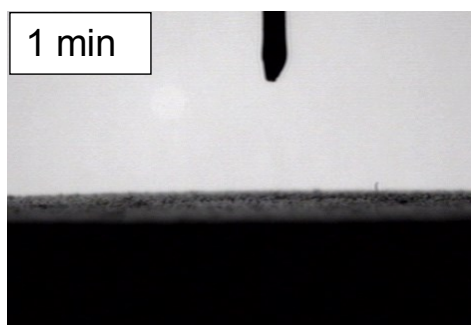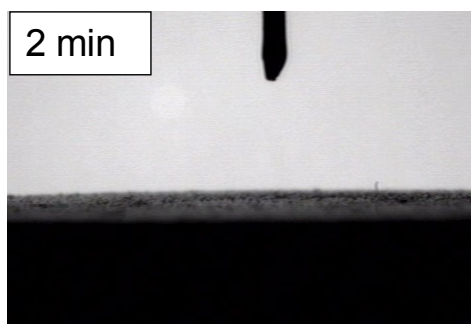

(b) MDZ\_10d\_RC

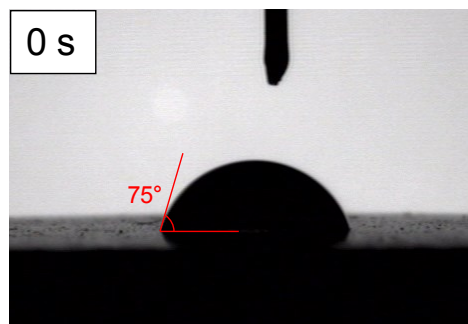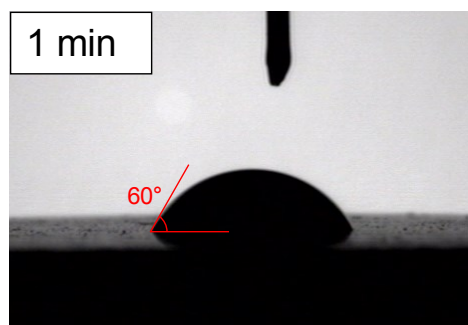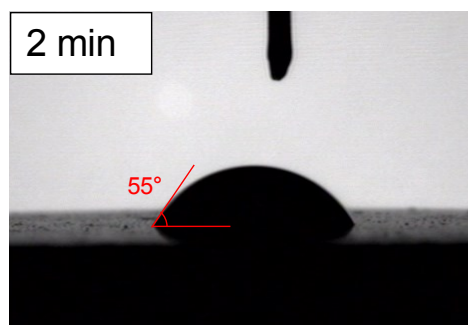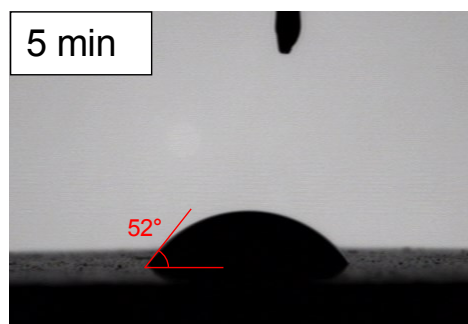

Fig. S12. Contact angles of water droplets on MDZ\_10d\_C (*left*) and MDZ\_10d\_RC (*right*) as a function of time.

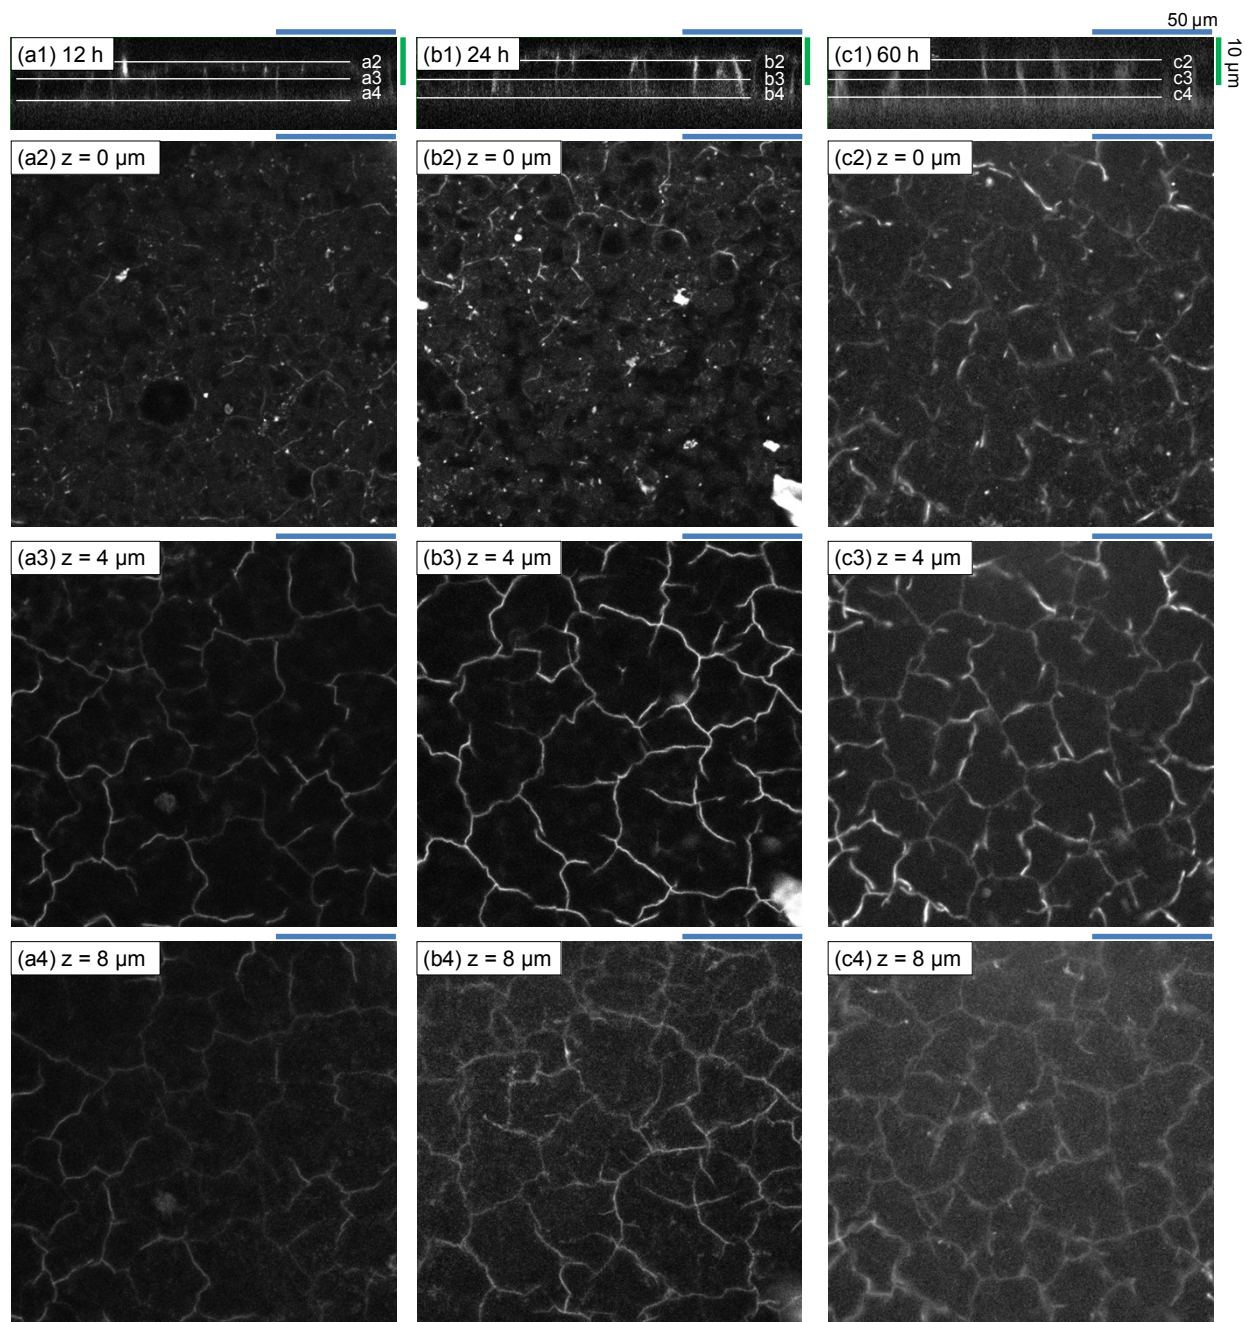

Fig. S13. (a1)-(c1) Cross-sectional view FCOM images of MDZ\_10d\_C along with (a2)-(c2), (a3)-(c3), and (a4)-(c4) top view FCOM images taken at the positions indicated in the cross-sectional view FCOM images after dyeing durations of 12 h, (a1)-(a4), 24 h, (b1)-(b4), and 60 h, (c1)-(c4). In the cross-sectional view, the blue (50  $\mu\text{m}$ ) and green (10  $\mu\text{m}$ ) bars represent the length scale in the horizontal and vertical directions, respectively, whereas the blue bars in the top view cover both horizontal and vertical directions.

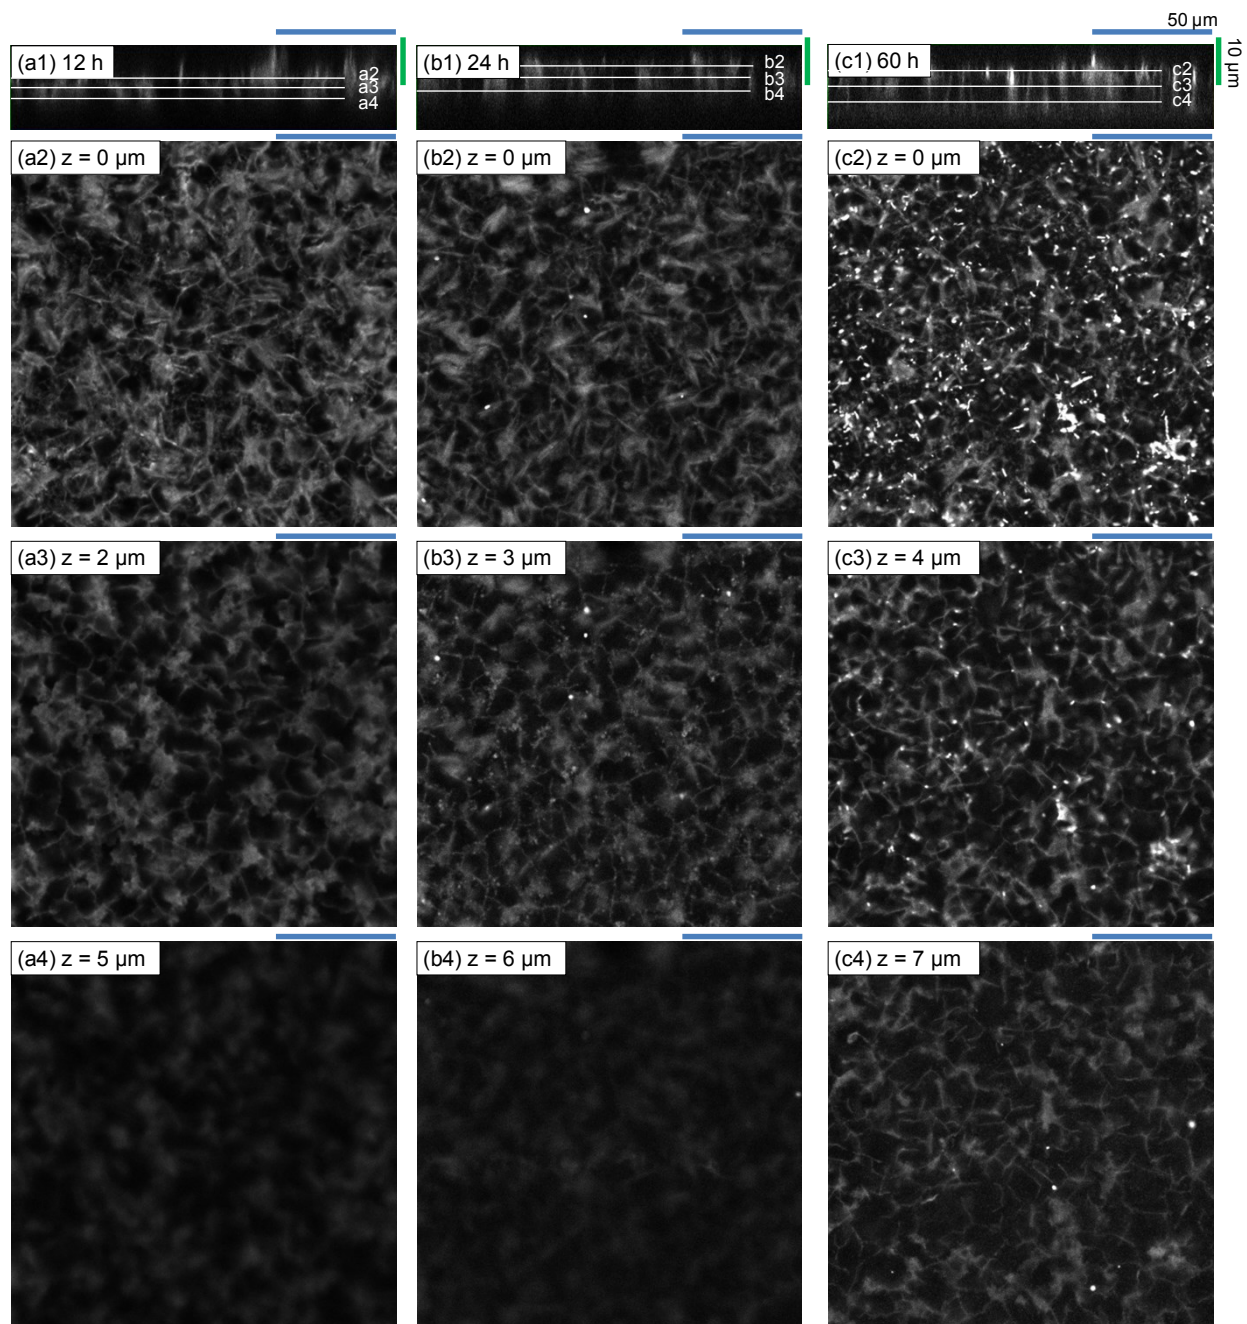

Fig. S14. (a1)-(c1) Cross-sectional view FCOM images of MDZ\_10d\_RC along with (a2)-(c2), (a3)-(c3), and (a4)-(c4) top view FCOM images taken at the positions indicated in the cross-sectional view FCOM images after dyeing durations of 12 h, (a1)-(a4), 24 h, (b1)-(b4), and 60 h, (c1)-(c4). In the cross-sectional view, the blue (50  $\mu\text{m}$ ) and green (10  $\mu\text{m}$ ) bars represent the length scale in the horizontal and vertical directions, respectively, while the blue bars in the top view cover both horizontal and vertical directions.

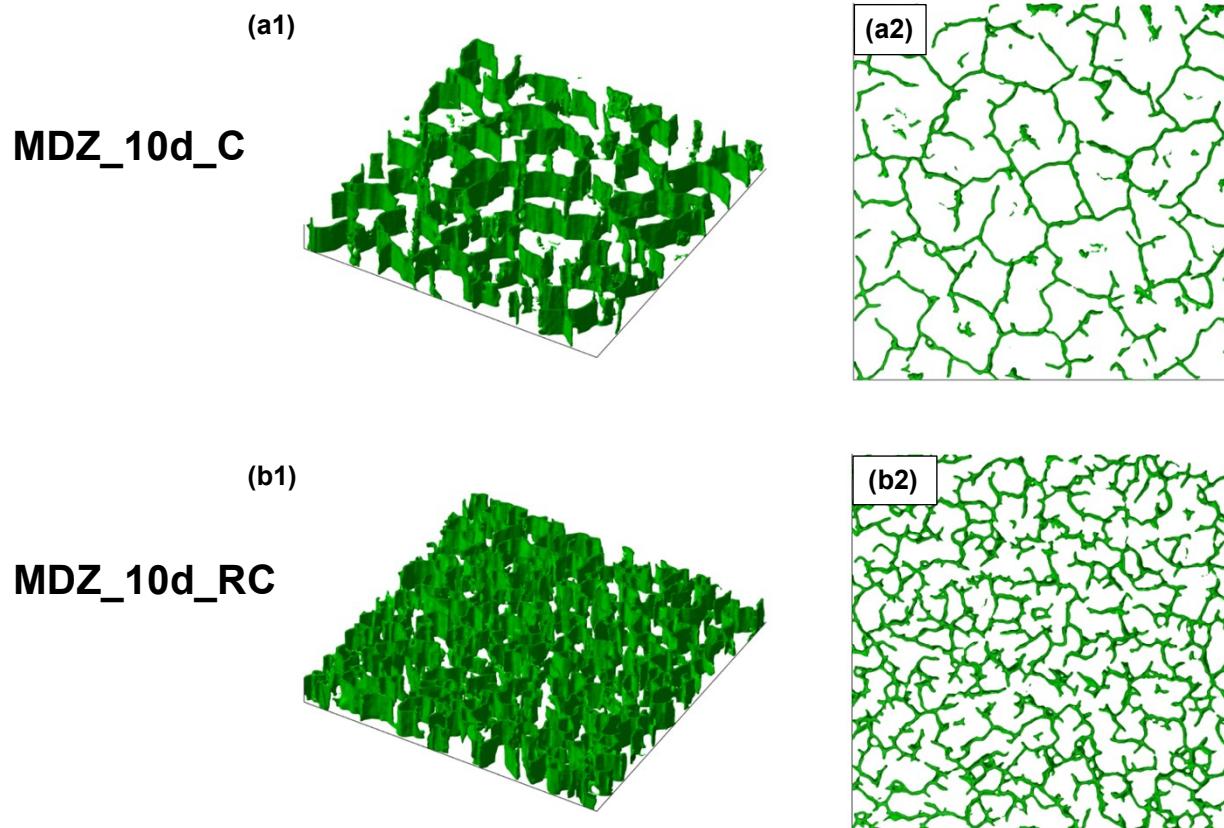

Fig. S15. Schematic illustration of the defect structures in (a1)-(a2) MDZ\_10d\_C and (b1)-(b2) MDZ\_10d\_RC, obtained via image analysis of the FCOM images shown in Figs. S13c1-c4 and S14c1-c4, respectively. Detailed information on the image analysis can be found elsewhere.<sup>13</sup>

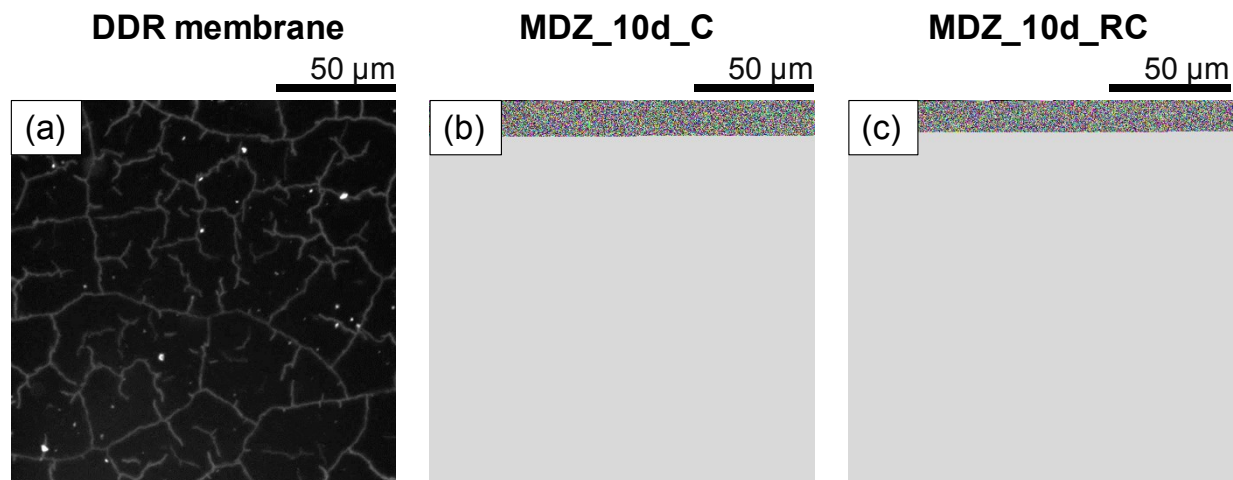

Fig. S16. Top view FCOM images of (a) a homogeneous DDR membrane<sup>4</sup> along with those of (b) MDZ\_10d\_C and (c) MDZ\_10d\_RC. The images were taken approximately 4  $\mu\text{m}$  below the membrane outer surface in each membrane.

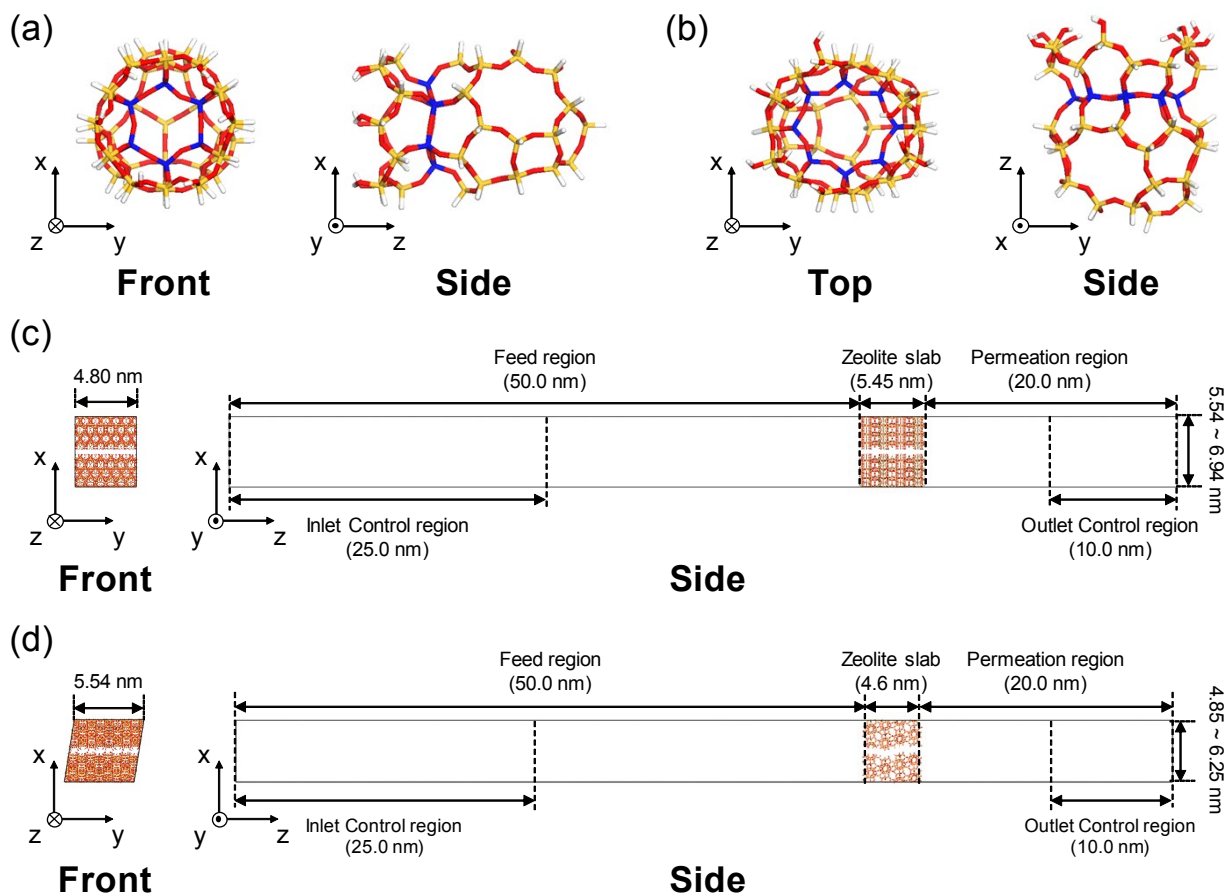

Fig. S17. (a)-(b) Cage-shaped cluster models of (a) DDR 46T and (b) 48T. (c) Slab model with the  $z$ -axis perpendicular to the (001) plane of the DDR zeolite. Depending on the width ( $d$ ) of the planar defect, the height of the simulation box was changed from 5.54 (non-defective and  $d = 0.6$  nm) to 6.94 nm ( $d = 2.0$  nm). (d) Slab model with the  $z$ -axis perpendicular to the (101) plane of the DDR zeolite. Depending on the width ( $d$ ) of the planar defect, the height of the simulation box was changed from 4.85 (non-defective and  $d = 0.6$  nm) to 6.25 nm ( $d = 2.0$  nm). In (a)-(b), silicon atoms that constitute 6- and 8-MR pore apertures, respectively, are marked in blue. Except these atoms, silicon, oxygen, and hydrogen atoms are marked in gold, red, and white, respectively.

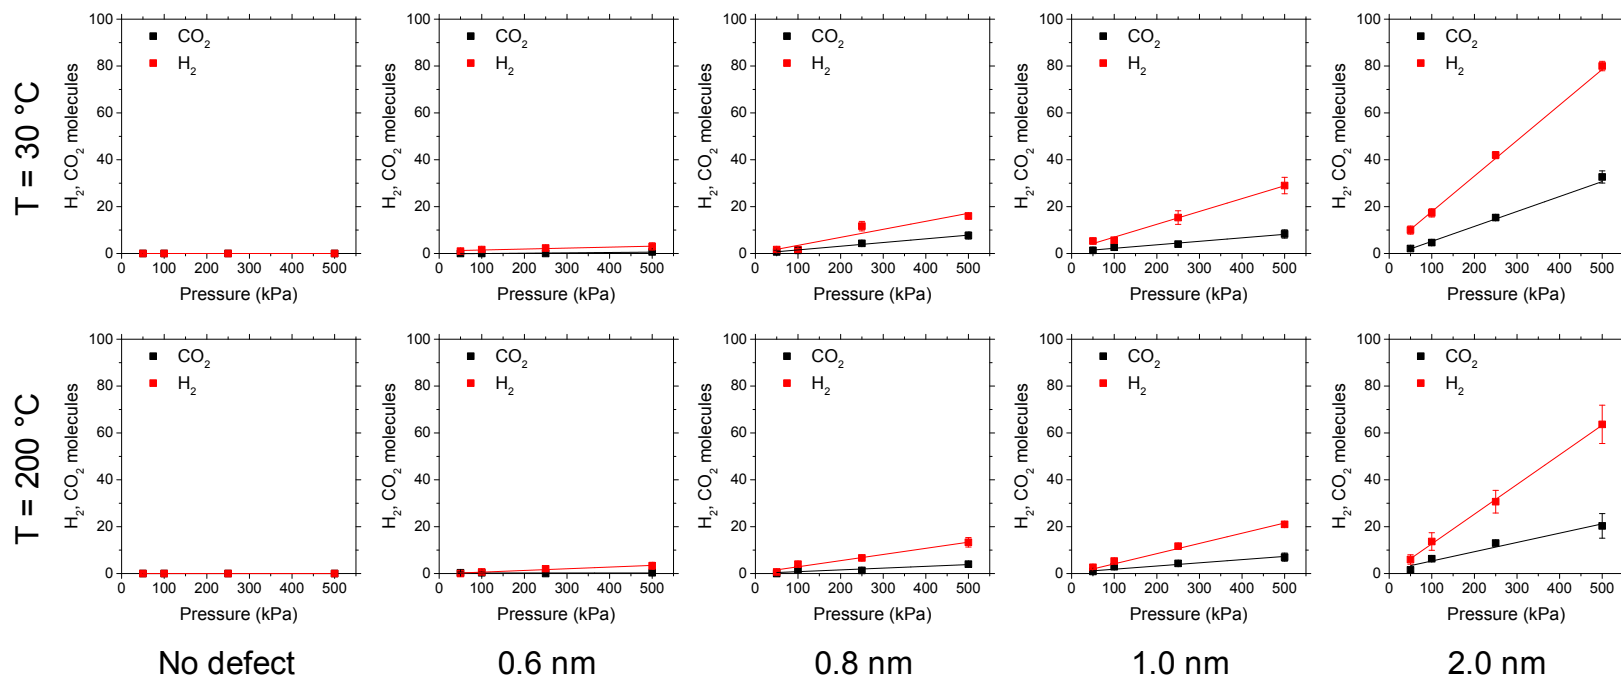

Fig. S18. Number of  $\text{CO}_2$  and  $\text{H}_2$  molecules passing through the  $c$ -oriented (i.e.,  $(001)$ -out-of-plane oriented) DDR membrane at different total feed pressures, defect widths, and temperatures. The lines show the linear regression results.

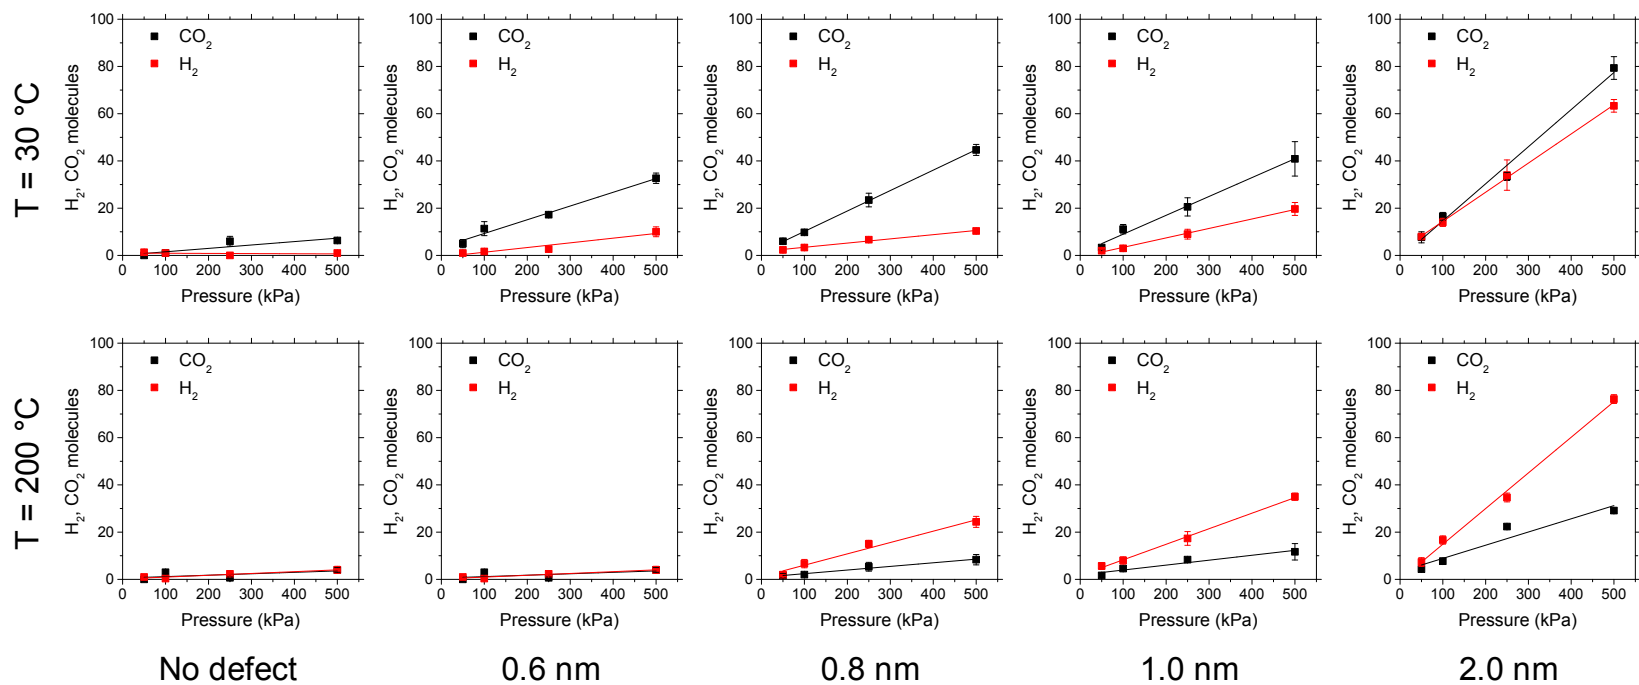

Fig. S19. Number of  $\text{CO}_2$  and  $\text{H}_2$  molecules passing through the (101)-out-of-plane oriented DDR membrane at different total feed pressures, defect widths, and temperatures. The lines show the linear regression results.

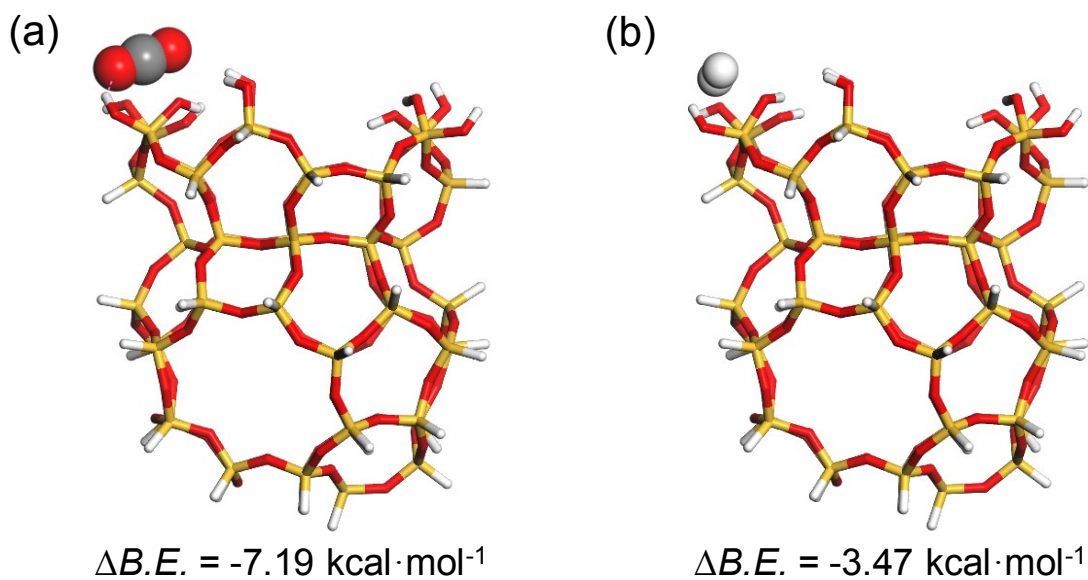

Fig. S20. (a)-(b) DFT calculations of the adsorption of (a)  $\text{CO}_2$  and (b)  $\text{H}_2$  near the silanol groups of the DDR 48T model. The adsorbed gas molecule and the 48T model are shown in the CPK and stick models, respectively. In addition, silicon, oxygen, hydrogen, and carbon atoms are marked in gold, red, white, and gray, respectively.

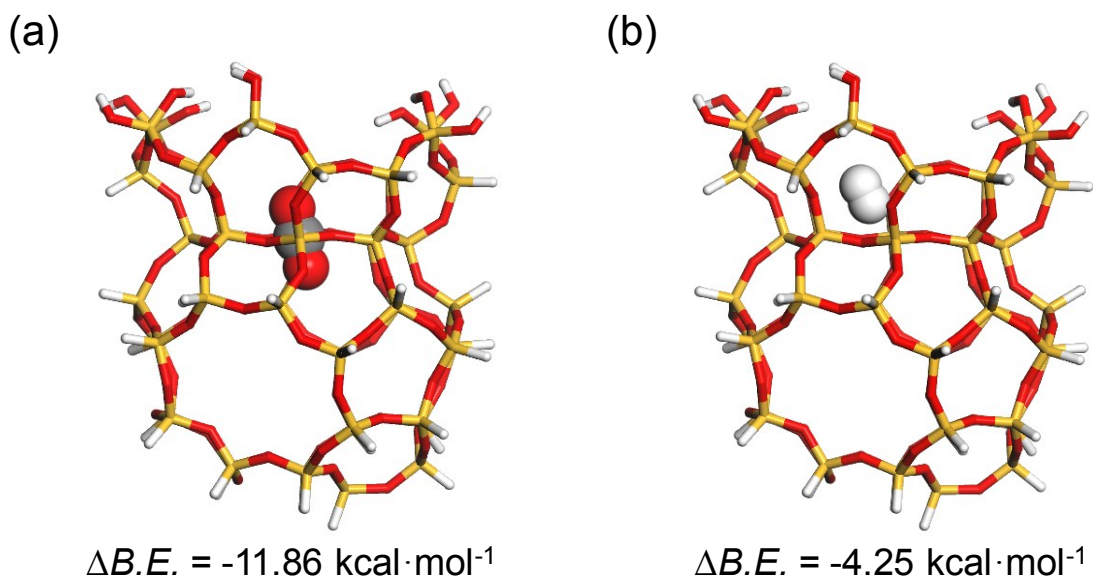

Fig. S21. (a)-(b) DFT calculations of the adsorption of (a) CO<sub>2</sub> and (b) H<sub>2</sub> at the cage mouth of the 8-MR in the DDR 48T model. An adsorbed gas molecule and the 48T model are shown in the CPK and stick models, respectively. In addition, silicon, oxygen, hydrogen, and carbon atoms are marked in gold, red, white, and gray, respectively.

Table S1. Initial number of gas molecules in the feed region calculated by GCMC simulation.

|                        |                        | Initial number of gas molecules in the feed region used for molecular dynamics |                |                        |                |                        |                |                        |                |
|------------------------|------------------------|--------------------------------------------------------------------------------|----------------|------------------------|----------------|------------------------|----------------|------------------------|----------------|
| Temperature            |                        | 30 °C                                                                          |                |                        |                | 200 °C                 |                |                        |                |
| Defect (nm)            | Partial pressure (kPa) | <i>(001)</i> -oriented                                                         |                | <i>(101)</i> -oriented |                | <i>(001)</i> -oriented |                | <i>(101)</i> -oriented |                |
|                        |                        | CO <sub>2</sub>                                                                | H <sub>2</sub> | CO <sub>2</sub>        | H <sub>2</sub> | CO <sub>2</sub>        | H <sub>2</sub> | CO <sub>2</sub>        | H <sub>2</sub> |
| Non-defect (0.0) & 0.6 | 50                     | 16                                                                             | 16             | 16                     | 16             | 10                     | 10             | 10                     | 10             |
|                        | 100                    | 32                                                                             | 32             | 32                     | 32             | 20                     | 20             | 21                     | 21             |
|                        | 250                    | 81                                                                             | 79             | 82                     | 80             | 51                     | 51             | 52                     | 51             |
|                        | 500                    | 166                                                                            | 158            | 167                    | 160            | 102                    | 101            | 104                    | 102            |
| 0.8                    | 50                     | 17                                                                             | 16             | 17                     | 17             | 11                     | 11             | 11                     | 11             |
|                        | 100                    | 33                                                                             | 33             | 34                     | 33             | 21                     | 21             | 21                     | 21             |
|                        | 250                    | 84                                                                             | 82             | 85                     | 83             | 53                     | 53             | 54                     | 53             |
|                        | 500                    | 172                                                                            | 164            | 174                    | 166            | 106                    | 105            | 108                    | 106            |
| 1.0                    | 50                     | 17                                                                             | 17             | 17                     | 17             | 11                     | 11             | 11                     | 11             |
|                        | 100                    | 34                                                                             | 34             | 35                     | 35             | 22                     | 22             | 22                     | 22             |
|                        | 250                    | 87                                                                             | 85             | 89                     | 87             | 55                     | 54             | 56                     | 55             |
|                        | 500                    | 178                                                                            | 170            | 181                    | 173            | 109                    | 109            | 112                    | 111            |
| 2.0                    | 50                     | 20                                                                             | 20             | 21                     | 21             | 13                     | 13             | 13                     | 13             |
|                        | 100                    | 40                                                                             | 40             | 42                     | 41             | 26                     | 26             | 27                     | 26             |
|                        | 250                    | 101                                                                            | 99             | 105                    | 103            | 64                     | 64             | 66                     | 66             |
|                        | 500                    | 207                                                                            | 198            | 215                    | 205            | 128                    | 127            | 133                    | 132            |

## References

1. A. Corma, V. Fornes, S.B. Pergher, T.L.M. Maesen and J.G. Buglass, *Nature*, 1998. **396**(6709), 353-356.
2. E. Kim, W. Cai, H. Baik and J. Choi, *Angew. Chem., Int. Ed.*, 2013. **52**(20), 5280-5284.
3. T. Tomita, K. Nakayama and H. Sakai, *Microporous Mesoporous Mater.*, 2004. **68**(1-3), 71-75.
4. E. Kim, S. Hong, E. Jang, J.H. Lee, J.C. Kim, N. Choi, C.H. Cho, J. Nam, S.K. Kwak, A.C.K. Yip and J. Choi, *J. Mater. Chem. A*, 2017. **5**(22), 11246-11254.
5. J. Choi, S. Ghosh, Z.P. Lai and M. Tsapatsis, *Angew. Chem., Int. Ed.*, 2006. **45**(7), 1154-1158.
6. J. Kim, E. Jang, S. Hong, D. Kim, E. Kim, H. Richter, A. Simon, N. Choi, D. Korelskiy, S. Fouladvand, J. Nam and J. Choi, *J. Membr. Sci.*, 2019. **591**, 10.
7. A. Boultif and D. Louër, *J. Appl. Cryst.*, 2004. **37**(5), 724-731.
8. J. Rodríguez-Carvajal, *Physica B*, 1993. **192**(1-2), 55-69.
9. A. Le Bail, *Powder Diffr.*, 2005. **20**(4), 316-326.
10. V. Petříček, M. Dušek and L. Palatinus, *Z. Kristallogr.*, 2014. **229**(5), 345-352.
11. J. Choi, H.K. Jeong, M.A. Snyder, J.A. Stoeger, R.I. Masel and M. Tsapatsis, *Science*, 2009. **325**(5940), 590-593.
12. T. Lee, J. Choi and M. Tsapatsis, *J. Membr. Sci.*, 2013. **436**, 79-89.
13. S. Hong, D. Kim, Y. Jeong, E. Kim, J.C. Jung, N. Choi, J. Nam, A.C.K. Yip and J. Choi, *Chem. Mater.*, 2018. **30**(10), 3346-3358.
14. G. Barone, N. Armata, A. Prestianni, T. Rubino, D. Duca and D.Y. Murzin, *J. Chem. Theory Comput.*, 2009. **5**(5), 1274-1283.
15. V. Shapovalov and A.T. Bell, *J. Phys. Chem. C*, 2010. **114**(41), 17753-17760.
16. B. Delley, *J. Chem. Phys.*, 1990. **92**(1), 508-517.
17. B. Delley, *J. Chem. Phys.*, 2000. **113**(18), 7756-7764.
18. J.P. Perdew, K. Burke and M. Ernzerhof, *Phys. Rev. Lett.*, 1996. **77**(18), 3865-3868.
19. A. Tkatchenko and M. Scheffler, *Phys. Rev. Lett.*, 2009. **102**(7), 073005.
20. S. Plimpton, *J. Comput. Phys.*, 1995. **117**(1), 1-19.
21. J.G. Harris and K.H. Yung, *J. Phys. Chem.*, 1995. **99**(31), 12021-12024.
22. A.V.A. Kumar, H. Jobic and S.K. Bhatia, *J. Phys. Chem. B*, 2006. **110**(33), 16666-16671.
23. R.T. Cygan, J.J. Liang and A.G. Kalinichev, *J. Phys. Chem. B*, 2004. **108**(4), 1255-1266.
24. Dassault Systèmes BIOVIA, Materials Studio 2018, San Diego: Dassault Systèmes, 2018.
25. Y. Jeong, S. Hong, E. Jang, E. Kim, H. Baik, N. Choi, A.C.K. Yip and J. Choi, *Angew. Chem., Int. Ed.*, 2019. **58**(51), 18654-18662.
